# Supplementary material for: Active Ebola Virus Replication and Heterogeneous Evolutionary Rates in EVD Survivors
Source: PubMed Central journal article supplement — Cell Rep. 2018 Jan 30;22(5):1159–68. doi: 10.1016/j.celrep.2018.01.008 (PMC5809616; doi:10.1016/j.celrep.2018.01.008), 2018-01-30
Supplement: mmc1.pdf [file mmc1.pdf]

**Cell Reports, Volume 22**

## **Supplemental Information**

### **Active Ebola Virus Replication and Heterogeneous Evolutionary Rates in EVD Survivors**

**Shannon L.M. Whitmer, Jason T. Ladner, Michael R. Wiley, Ketan Patel, Gytis Dudas, Andrew Rambaut, Foday Sahr, Karla Prieto, Samuel S. Shepard, Ellie Carmody, Barbara Knust, Dhamari Naidoo, Gibrilla Deen, Pierre Formenty, Stuart T. Nichol, Gustavo Palacios, Ute Ströher, and Ebola Virus Persistence Study Group**

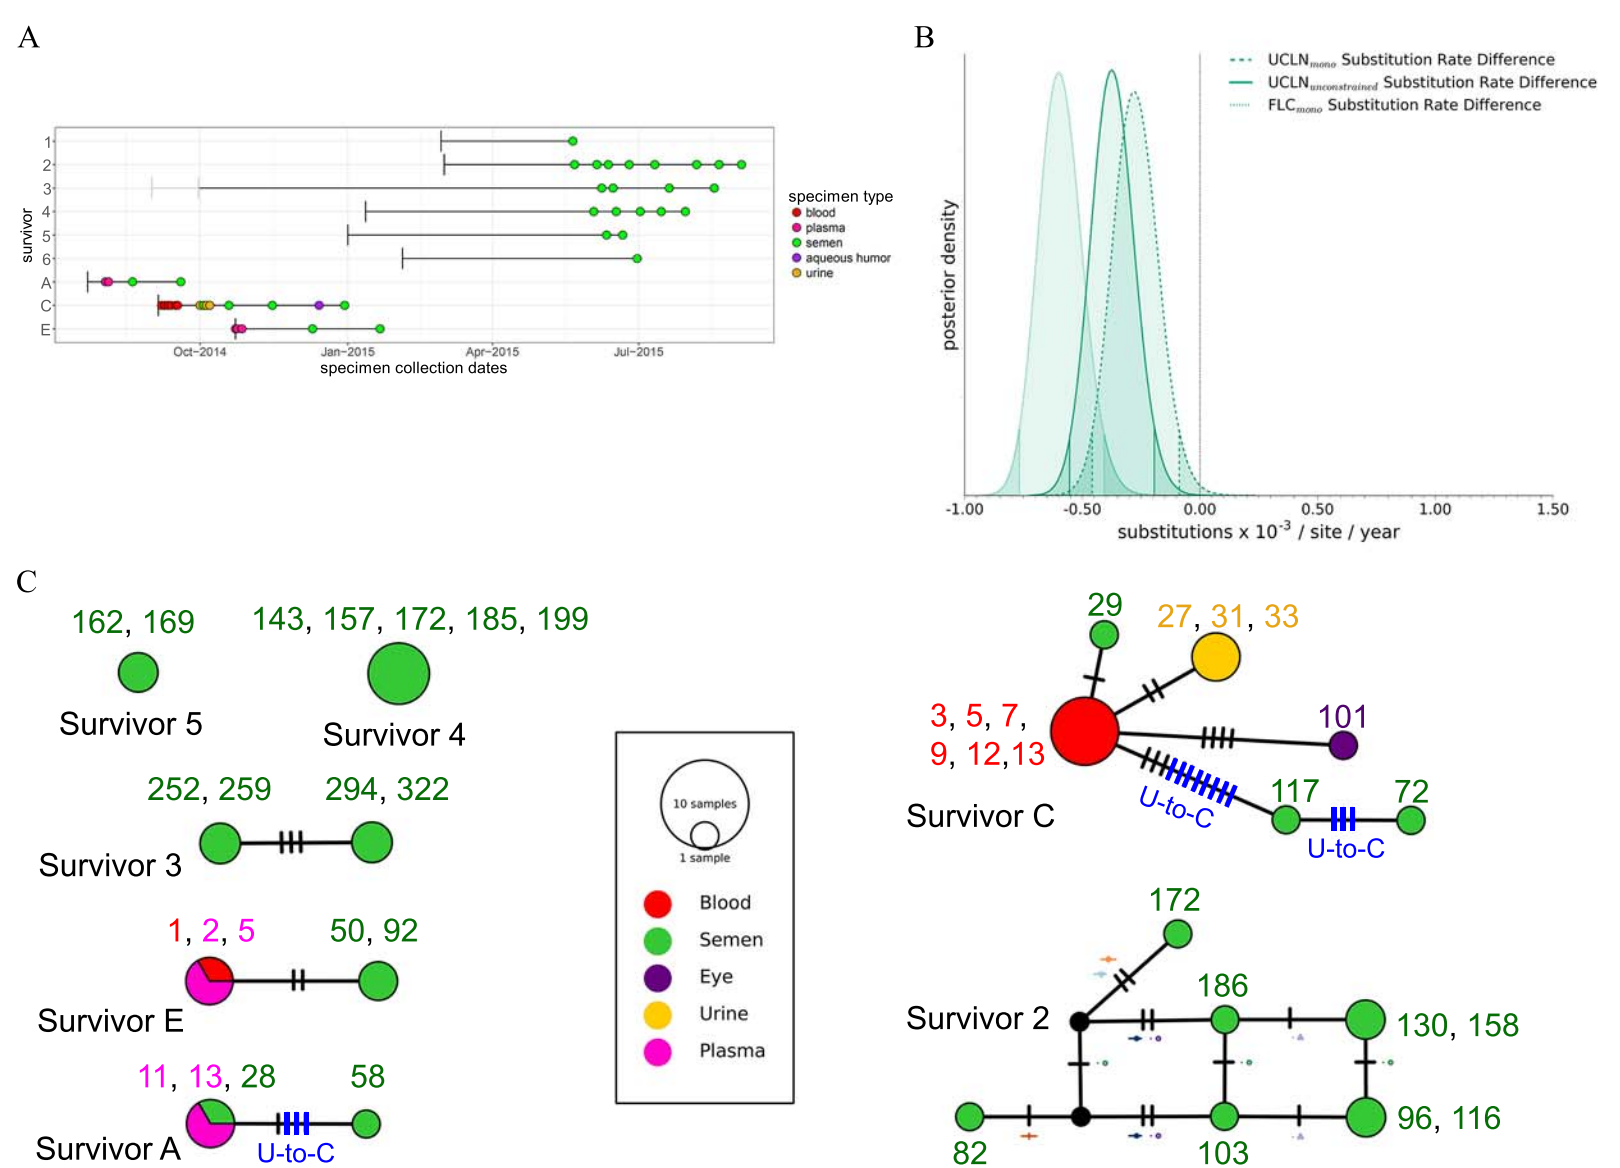

**Figure S1:** Overview of clinical specimens collected from Ebola virus disease (EVD) survivors, viral evolutionary rates and comparison of viral sequence changes per survivor, Related to Figures 1 and 2. **A)** Overview of clinical specimens collected from Ebola virus disease (EVD) survivors in Sierra Leone (survivors 1, 2, 3, 4, 5, and 6) and in the United States (survivors A, C, E). Survivor-reported symptom onset date is indicated with a black vertical bar, and survivor-reported ambiguity in onset is illustrated with a grey line (survivor 3). Clinical specimens from US EVD survivors were collected during acute and persistent infection, while clinical specimens from Sierra Leonean EVD survivors were collected only during persistent viral infection. Additional specimens were collected from survivors; here we only include specimens that produced a nearly-complete viral genome. **B)** Ebola virus in semen specimens from Sierra Leonean EVD survivors exhibits reduced evolutionary rates. Posterior distribution of evolutionary rate differences from serial semen specimens provided by EVD survivors relative to acute viral evolutionary rates calculated under FLC and UCLN clock models.  $FLC_{mono}$  and  $UCLN_{mono}$  rates were calculated with SAVS constrained to survivor-specific monophyletic taxa (2, 3, 4, and 5), while  $UCLN_{unconstrained}$  rates were calculated without prior assumptions on the tree. Regions within the shaded density tails indicate the 95% highest posterior density interval (HPDI) and black dotted line indicates zero rate distribution difference. **C)** Comparison of AAVS and SAVS from EVD survivors. Median joining haplotype networks constructed using AAVS and SAVS from EVD survivors. Vertical bars indicate nucleotide changes (excluding regions that contain N, ? or -, representing less than 1.1% of consensus genomes. A single sequence with low coverage was removed from this figure (KY805812, survivor C)). Nodes are colored according to specimen matrix from which viral sequences were obtained and node size represents the number of clinical specimens. Numbers above nodes represent dayspost symptom onset. For survivor 2, symbols next to vertical bars coincide with iSNVs symbols in Supplemental Figure 2A. SAVS from survivors A (3 sites) and C (11 sites) exhibited potential evidence of human U-to-C hyper-editing following prolonged MGT persistence.

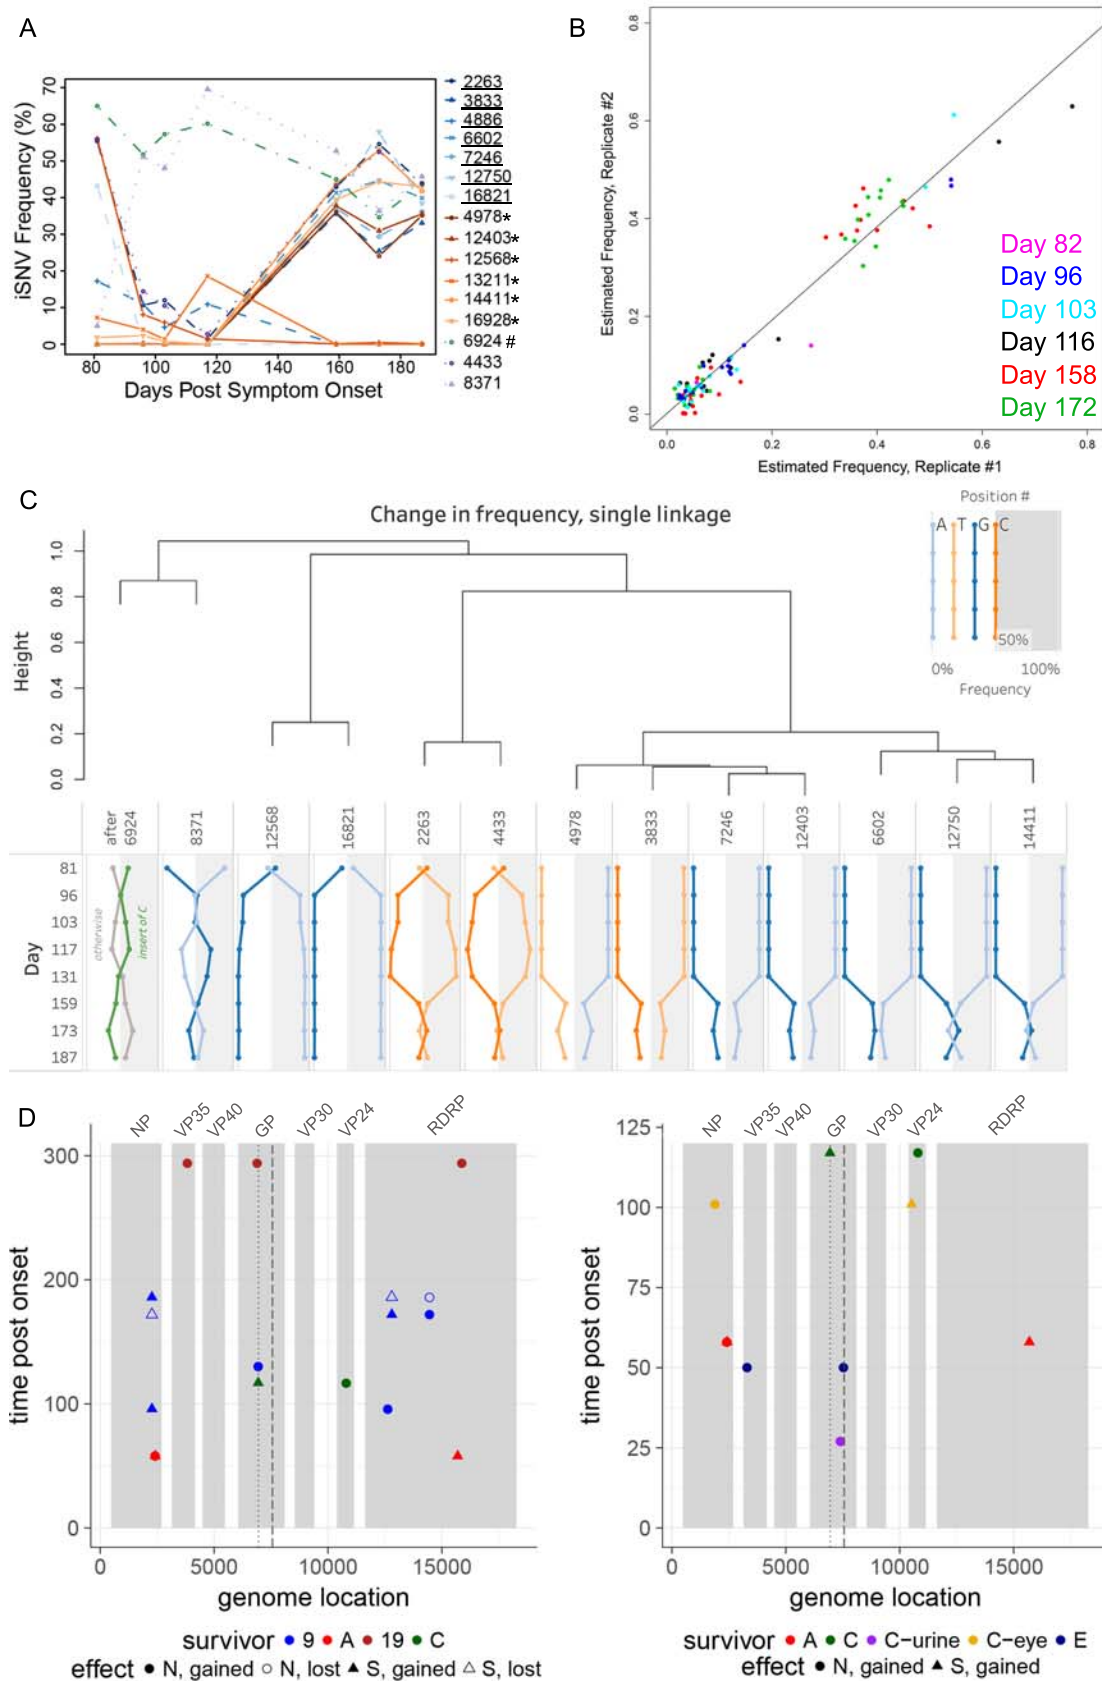

**Figure S2:** Comparison of AAVS and SAVS from EVD survivors, Related to Figures 2 and 3. **A)** Change in frequency for intrahost single nucleotide variants (iSNVs) (with greater than 15% frequency in a single specimen) versus time post symptom onset for Survivor 2. Sites that result in synonymous (underlined), nonsynonymous (starred), or frameshift (hash) mutations are highlighted and sites without annotations occur in noncoding regions. **B)** Resequencing of technical duplicates yields a similar correlation in iSNV frequencies for SAVS from survivor 2 ( $r^2=0.9515$ ). **C)** Frequency of intrahost single nucleotide variants (iSNVs) versus time post symptom onset for Survivor 2. A pairwise (Manhattan) distance matrix was computed for each position-allele combination with the vector of the observed frequencies ordered by specimen date. The matrix was used to generate a single-linkage dendrogram (top). Frequency line graphs of iSNV positions, major/minor alleles, and specimen dates were ordered by their position in the dendrogram. Key in upper right-hand corner illustrates allele state (major or minor - grey shading) and value (A, T, C, or G). The presence of co-varying frequency changes suggests either: 1) distinct viral sub-populations, and/or 2) epistasis at the co-varying sites. **D-E)** Acquisition/Loss of synonymous (S) or nonsynonymous (N) changes in SAVS compared to earliest SAVS or AAVS from each survivor. **D)** Coding region changes for SAVS compared to earliest available SAVS from each survivor. Dotted line indicates glycoprotein editing site and dashed line indicates GPI/2 cleavage site. **E)** Coding region changes for SAVS compared to earliest available AAVS from each survivor. Dotted line indicates glycoprotein editing site and dashed line indicates GPI/2 cleavage site.

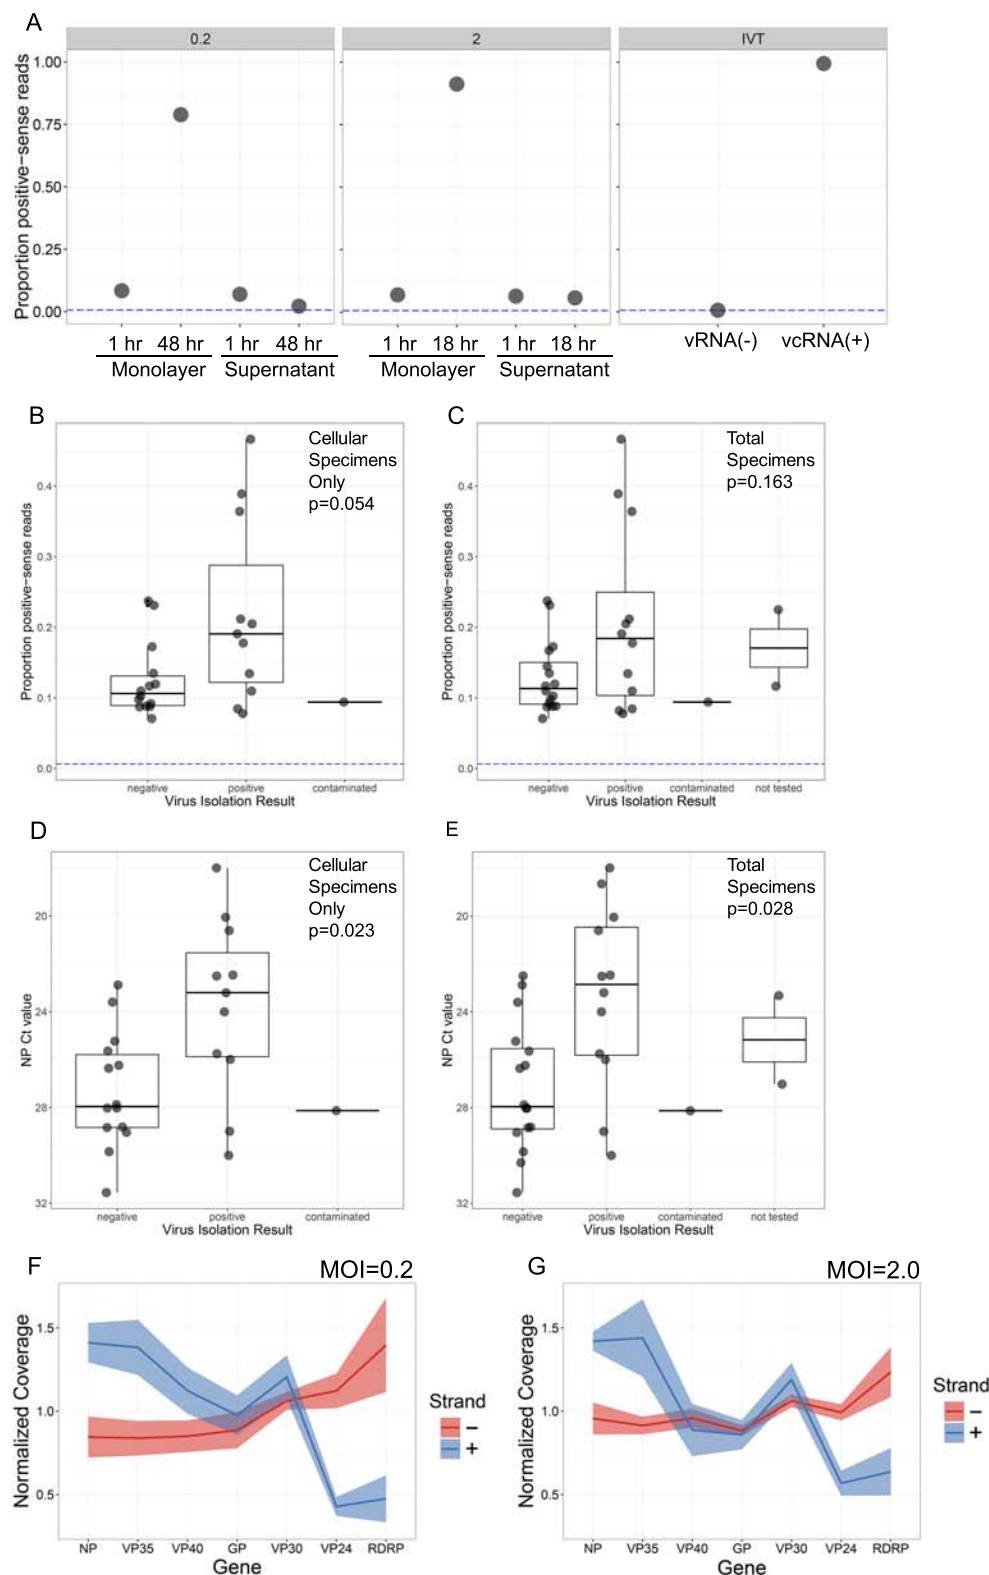

**Figure S3:** Supportive evidence for active viral replication during persistent infection, Related to Figure 4. To confirm the presence of positive-sense reads from SAVS, we validated our NGS assay with RNA extracted from Huh7 cells infected with recombinant Ebola virus encoding for ZsGreen protein (EBOV-ZsGreen) and *in vitro* transcribed RNA. **A**) Proportion of EBOV genome-wide positive-sense reads sequenced with NGS from an *in vitro* infection of Huh7 cells done at an MOI of 0.2 (1 and 48hpi) (left panel) or 2.0 (1 and 18hpi) (middle panel). Right panel indicates proportion of EBOV genome-wide positive-sense reads from the *in vitro* transcription (IVT) of a negative-sense (vRNA(-)) or positive (vcRNA(+)) viral transcript. **B**) One-sided ANOVA indicates a modest relationship between the proportion of positive-sense reads and virus isolation results ( $p=0.054$ ). This analysis was conducted on clinical specimens containing only cellular material (blood and semen). Maxima and minima in boxplot illustrates the 25th and 75th percentiles, black line indicates median values, whiskers indicate the highest/lowest values within  $1.5\times$  the inter-quartile range. **C**) One-sided ANOVA indicates a limited relationship between the proportion of positive-sense reads and virus isolation results ( $p=0.163$ ). This analysis was conducted on clinical specimens containing both acellular (urine, aqueous humor, and plasma) and cellular material (blood and semen). Boxplot values are described in panel B. **D**) One-sided ANOVA indicates a statistically significant ( $p<0.05$ ) relationship between NP real-time polymerase chain reaction (RT-PCR) cycle threshold (Ct) value and virus isolation results ( $p=0.023$ ). This analysis was only conducted on clinical specimens containing cellular material (blood and semen). Boxplot values are described in panel B. **E**) One-sided ANOVA indicates a statistically significant relationship between NP Ct value and virus isolation results ( $p=0.028$ ). This analysis was conducted on clinical specimens containing both acellular (urine, aqueous humor, and plasma) and cellular material (blood and semen). Boxplot values are described in panel B. **F**) Proportion of strand-specific reads per EBOV gene (normalized to total positive- or negative-sense reads) from *in vitro* infection of Huh7 cells at MOI of 0.2. Data represents monolayer and supernatant samples collected after one hour and 48hrs post infection. Negative-sense reads in red, and positive-sense reads in blue. **G**) Proportion of strand-specific reads per EBOV gene (normalized to total positive- or negative-sense reads) from *in vitro* infection of Huh7 cells at MOI of 2. Data represents monolayer and supernatant samples collected after one hour and 18 hrs post infection. Negative-sense reads in red, and positive-sense reads in blue.

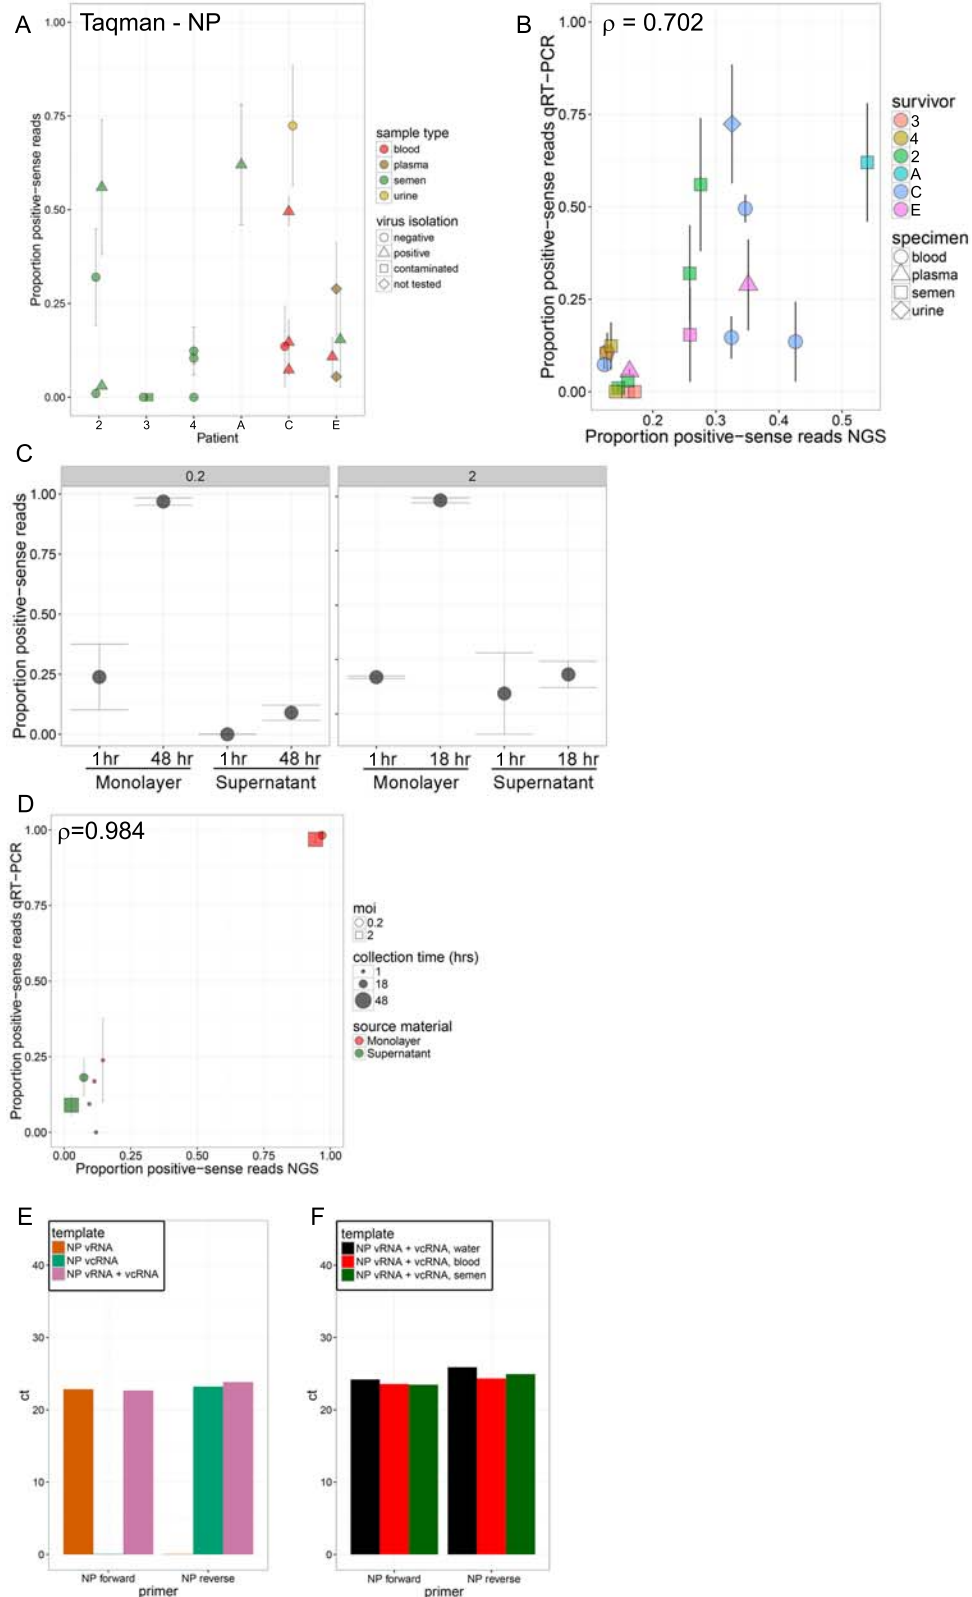

**Figure S4:** Supportive qRT-PCT evidence of active viral replication during persistent infection, Related to Figure 4. NGS strandedness assay results were further verified by performing strand-specific qRT-PCR with synthetic positive- and negative-sense RNA, RNA remaining from clinical specimens and RNA extracted from Huh7 cells infected with EBOV-ZsGreen. **A)** Proportion of EBOV NP-specific positive-sense reads from each EVD survivor specimen. Specimen types are highlighted with different colors and error bars indicate standard deviations between biological replicates. Virus isolation was attempted on most specimens, and point shape indicates virus isolation results. **B)** Correlation between the proportions of NP-specific positive-sense reads detected by stranded next-generation sequencing and qRT-PCR using RNA extracted from the semen of EVD survivors. Error bars indicate standard deviations in copy numbers detected by qRT-PCR between biological replicates. A positive monotonic relationship was detected as measured by Spearman's rank-order correlation ( $\rho=0.702$ ). **C)** Proportion of EBOV NP-specific positive-sense reads from an in vitro infection of Huh7 cells done at an MOI of 0.2 (1 and 48hpi) or 2 (1 and 18hpi). Error bars indicate standard deviations in copy numbers detected by qRT-PCR between biological replicates. **D)** Correlation between the proportions of NP-specific positive-sense reads detected by stranded next-generation sequencing and qRT-PCR using RNA extracted from an in vitro infection of Huh7 cells. Error bars indicate standard deviations in copy numbers detected by qRT-PCR between biological replicates. A strongly positive monotonic relationship was detected as measured by Spearman's rank-order correlation ( $\rho=0.984$ ). **E)** Specificity of NP stranded qRT-PCR assays. Specificity of forward and reverse qRT-PCT assays was assessed and confirmed using negative or positive-sense synthetic RNA, or a mixture of the two strands. **F)** Specificity of NP stranded qRT-PCR assay. Specificity of forward and reverse qRT-PCT assays was assessed and confirmed using negative and positive-sense synthetic RNA. Mixtures of synthetic RNA were spiked into water, or RNA extracted from normal human blood or semen.

**Table S1:** Evolutionary Rate Estimates from non-edited and edited SAVS from SLE and US EVD Survivors, Related to Figures 1 and 2.

| SLE EVD SURVIVORS:                                                         |                                                                               |                              |                              |                    |
|----------------------------------------------------------------------------|-------------------------------------------------------------------------------|------------------------------|------------------------------|--------------------|
| Clock Model                                                                | Rate Estimates (*10 <sup>3</sup> subs/site/year) mean [95%HPD lower - upper]  |                              |                              |                    |
|                                                                            | Acute Rate                                                                    |                              | Latent Rate                  |                    |
| No Edits                                                                   | 0.963 (0.863-1.066)                                                           | 0.674 (0.504-0.846)          |                              |                    |
| Hyper-edits removed                                                        | 0.895 (0.805-0.991)                                                           | 0.739 (0.580-0.904)          |                              |                    |
| Clock Model                                                                | Rate Estimates (*10 <sup>-3</sup> subs/site/year) mean [95%HPD lower - upper] |                              |                              |                    |
|                                                                            | Survivor 1                                                                    | Survivor 2                   | Survivor 3                   |                    |
| No Edits                                                                   | 0.500 (0.122-0.969)                                                           | 0.631 (0.418-0.853)          | 0.862 (0.441-1.339)          |                    |
| Hyper-edits removed                                                        | 0.631 (0.238-1.068)                                                           | 0.710 (0.514-0.918)          | 0.856 (0.529-1.209)          |                    |
| Clock Model                                                                | Rate Estimates (*10 <sup>-3</sup> subs/site/year) mean [95%HPD lower - upper] |                              |                              |                    |
|                                                                            | Survivor 4                                                                    | Survivor 5                   | Survivor 6                   |                    |
| No Edits                                                                   | 0.717 (0.391-1.071)                                                           | 0.787 (0.230-1.502)          | 0.751 (0.298-1.261)          |                    |
| Hyper-edits removed                                                        | 0.776 (0.498-1.042)                                                           | 0.815 (0.367-1.334)          | 0.783 (0.383-1.225)          |                    |
| Clock Model - Unedited                                                     | Loglikelihood Path Sampling                                                   |                              | Loglikelihood Stepping Stone |                    |
|                                                                            | Average                                                                       | Standard Deviation           | Average                      | Standard Deviation |
| <i>Relaxed Clock (UCLN), Skygrid</i>                                       | -34238.4                                                                      | 7.9                          | -34246.3                     | 7.9                |
| Relaxed Clock (UCLN), constant population                                  | -34359.0                                                                      | 4.4                          | -34363.1                     | 5.1                |
| Relaxed Clock (UCLN) - monophyly, constant population                      | -34331.5                                                                      | 4.4                          | -34340.3                     | 5.1                |
| Fixed Local Clock - monophyly, individual rates, constant population       | -34427.0                                                                      | 10.1                         | -34434.7                     | 6.5                |
| Fixed Local Clock - monophyly, persistent rate, constant population        | -34365.1                                                                      | 10.0                         | -34369.7                     | 9.2                |
| Clock Model - Hyper-edits removed                                          | Loglikelihood Path Sampling                                                   |                              | Loglikelihood Stepping Stone |                    |
|                                                                            | Average                                                                       | Standard Deviation           | Average                      | Standard Deviation |
| <i>Relaxed Clock (UCLN), Skygrid</i>                                       | -33822.7                                                                      | 4.9                          | -33830.6                     | 6.6                |
| Relaxed Clock (UCLN), constant population                                  | -33939.6                                                                      | 3.7                          | -33946.7                     | 3.8                |
| Relaxed Clock (UCLN) - monophyly, constant population                      | -33901.5                                                                      | 7.3                          | -33912.0                     | 13.6               |
| Fixed Local Clock - monophyly, individual rates, constant population       | -33928.6                                                                      | 2.2                          | -33940.2                     | 4.7                |
| Fixed Local Clock - monophyly, persistent rate, constant population        | ND                                                                            | ND                           | ND                           | ND                 |
| US EVD SURVIVORS:                                                          |                                                                               |                              |                              |                    |
| Clock Model                                                                | Rate Estimates (subs/site/year) mean [95%HPD lower - upper]                   |                              |                              |                    |
|                                                                            | Acute Rate                                                                    | Blood Rate                   | Persistence Rate             |                    |
| No Edits                                                                   | 1.152 (1.043-1.267)                                                           | 0.884 (0.518-1.290)          | 1.290 (0.903-1.713)          |                    |
| Hyper-edits removed                                                        | 1.041 (0.937-1.138)                                                           | 0.888 (0.577-1.235)          | 0.859 (0.617-1.133)          |                    |
| Clock Model                                                                | Rate Estimates (subs/site/year) mean [95%HPD lower - upper]                   |                              |                              |                    |
|                                                                            | Survivor A - Acute                                                            | Survivor A - Semen           |                              |                    |
| No Edits                                                                   | 1.037 (0.257-2.103)                                                           | 1.378 (0.426-2.619)          |                              |                    |
| Hyper-edits removed                                                        | 0.979 (0.331-1.805)                                                           | 0.816 (0.264-1.499)          |                              |                    |
| Clock Model                                                                | Rate Estimates (subs/site/year) mean [95%HPD lower - upper]                   |                              |                              |                    |
|                                                                            | Survivor E - Acute                                                            | Survivor E - Semen           |                              |                    |
| No Edits                                                                   | 0.962 (0.530-1.475)                                                           | 0.571 (0.132-1.137)          |                              |                    |
| Hyper-edits removed                                                        | 0.848 (0.361-1.419)                                                           | 0.634 (0.187-1.174)          |                              |                    |
| Clock Model                                                                | Rate Estimates (subs/site/year) mean [95%HPD lower - upper]                   |                              |                              |                    |
|                                                                            | Survivor C - Acute                                                            | Survivor C - Semen and Urine | Survivor C - Eye             |                    |
| No Edits                                                                   | 0.962 (0.530-1.475)                                                           | 1.431 (0.940-1.956)          | 0.903 (0.264-1.662)          |                    |
| Hyper-edits removed                                                        | 0.948 (0.572-1.365)                                                           | 0.916 (0.619-1.241)          | 0.930 (0.306-1.669)          |                    |
| Clock Model - unedited                                                     | Loglikelihood Path Sampling                                                   |                              | Loglikelihood Stepping Stone |                    |
|                                                                            | Average                                                                       | Standard Deviation           | Average                      | Standard Deviation |
| <i>Relaxed Clock (UCLN), Skygrid</i>                                       | -38288.5                                                                      | 9.3                          | -38302.7                     | 8.7                |
| Relaxed Clock (UCLN), constant population                                  | -38456.4                                                                      | 8.8                          | -38470.6                     | 8.9                |
| Relaxed Clock (UCLN) - monophyly, constant population                      | -38406.7                                                                      | 5.7                          | -38420.0                     | 8.9                |
| Fixed Local Clock - monophyly, individual rates, constant population       | -38621.5                                                                      | 12.5                         | -38643.5                     | 24.2               |
| Fixed Local Clock - monophyly, blood/persistent rates, constant population | -38547.7                                                                      | 1.7                          | -38561.8                     | 9.8                |
| Clock Model - hyper-edits removed                                          | Loglikelihood Path Sampling                                                   |                              | Loglikelihood Stepping Stone |                    |
|                                                                            | Average                                                                       | Standard Deviation           | Average                      | Standard Deviation |
| <i>Relaxed Clock (UCLN), Skygrid</i>                                       | -37424.7                                                                      | 9.0                          | -37438.1                     | 8.7                |
| Relaxed Clock (UCLN), constant population                                  | -37578.0                                                                      | 8.5                          | -37591.7                     | 8.5                |
| Relaxed Clock (UCLN) - monophyly, constant population                      | -37503.8                                                                      | 9.8                          | -37529.9                     | 16.4               |
| Fixed Local Clock - monophyly, individual rates, constant population       | -37680.3                                                                      | 12.0                         | -37696.0                     | 5.5                |
| Fixed Local Clock - monophyly, blood/persistent rates, constant population | ND                                                                            | ND                           | ND                           | ND                 |

**Table S1:** Evolutionary Rate Estimates from non-edited and edited SAVS from SLE and US EVD Survivors, Related to Figures 1 and 2. **(TOP)** Bayesian analysis conducted using UCLNunconstrained clock models with un-edited viral sequences and U-to-C hyper-edits removed from viral sequences. Marginal likelihood values from path sampling and stepping stone analysis with different clock models and prior tree assumptions (Relaxed UCLNunconstrained, Relaxed UCLNmonophyletic, Fixed local clockmonophyletic-individual rates, and Fixed local clockmonophyletic-latent rates) are included on lower half. **(BOTTOM)** Evolutionary Rate Estimates from non-edited and edited SAVS using AAVS and SAVS from US EVD Survivors. Bayesian analysis conducted using UCLNunconstrained clock models with un-edited viral sequences and U-to-C hyper-edits removed from viral sequences. Marginal likelihood values from path sampling and stepping stone analysis using different clock models and prior tree assumptions (Relaxed UCLNunconstrained, Relaxed UCLNmonophyletic, Fixed local clockmonophyletic-individual rates, and Fixed local clockmonophyletic-latent rates) are included on lower half.

**Table S2:** Evolutionary Pressure and iSNV Analysis, Related to Figure 3.

| "branch models" (codeml) AAVS vs SAVS |        |                    |                                |
|---------------------------------------|--------|--------------------|--------------------------------|
| Gene                                  | 2ΔInL  | Degrees of Freedom | P value (Bonferroni corrected) |
| NP                                    | 0.67   | 1                  | 0.4118                         |
| VP35                                  | 3.04   | 1                  | 0.0814                         |
| VP40                                  | 4.29   | 1                  | 0.0384                         |
| NGP                                   | 0.01   | 1                  | 0.9395                         |
| Mucin                                 | 0.05   | 1                  | 0.8258                         |
| CGP                                   | 1.39   | 1                  | 0.2377                         |
| SGP without p19 tail                  | 16.06  | 1                  | <b>6.13E-05</b>                |
| SGP with p19 tail                     | 5.03   | 1                  | 0.0249                         |
| VP30                                  | 0.00   | 1                  | 0.9517                         |
| VP24                                  | 2.32   | 1                  | 0.1276                         |
| RDRP                                  | -61.67 | 1                  | 0.0000                         |

  

| "branch models" (codeml) AAVS vs SAVS <sub>fast</sub> vs SAVS <sub>slow</sub> |        |                    |                                |
|-------------------------------------------------------------------------------|--------|--------------------|--------------------------------|
| Gene                                                                          | 2ΔInL  | Degrees of Freedom | P value (Bonferroni corrected) |
| NP                                                                            | 0.73   | 1                  | 0.3921                         |
| VP35                                                                          | 3.05   | 1                  | 0.0806                         |
| VP40                                                                          | 4.01   | 1                  | 0.0451                         |
| NGP                                                                           | 0.15   | 1                  | 0.7030                         |
| Mucin                                                                         | 1.09   | 1                  | 0.2957                         |
| CGP                                                                           | 2.40   | 1                  | 0.1213                         |
| SGP without p19 tail                                                          | 0.92   | 1                  | 0.3382                         |
| SGP with p19 tail                                                             | 5.03   | 1                  | 0.0249                         |
| VP30                                                                          | 0.00   | 1                  | 0.9495                         |
| VP24                                                                          | 2.32   | 1                  | 0.1276                         |
| RDRP                                                                          | -65.01 | 1                  | 0.0000                         |

  

| "branch-site models" (codeml) AAVS vs SAVS |           |                    |                 |                                      |
|--------------------------------------------|-----------|--------------------|-----------------|--------------------------------------|
| Gene                                       | 2ΔInL     | Degrees of Freedom | P value         | Sites under positive selection (NEB) |
| NP                                         | 1.79      | 1                  | 0.1812          | 101 E 0.940, 376 V 0.939             |
| VP35                                       | 0.75      | 1                  | 0.3856          | 51 P 0.880                           |
| VP40                                       | 1.67      | 1                  | 0.1958          | 131 Q 0.958*, 252 V 0.960*           |
| NGP                                        | 5.40E-04  | 1                  | 0.9815          |                                      |
| Mucin                                      | 1.14      | 1                  | 0.2857          | 213 P 0.879, 264 T 0.879             |
| CGP                                        | 24.91     | 1                  | <b>6.00E-07</b> | <b>296 N 0.999**</b>                 |
| SGP without p19 tail                       | 24.89     | 1                  | <b>6.06E-07</b> | <b>296 T 0.999**, 315 P 0.782</b>    |
| SGP with p19 tail                          | 24.935648 | 1                  | <b>5.93E-07</b> | <b>296 T 0.999**, 315 P 0.766</b>    |
| VP30                                       | 0.01      | 1                  | 0.9166          |                                      |
| VP24                                       | 0.71      | 1                  | 0.3988          | 117 R 0.918                          |
| RDRP                                       | -3.02E-03 | 1                  | 0.0000          |                                      |

| Position | Gene                        | Major Variant   | Minor Variant     | Effect                                                            | Major Amino Acid          | Minor Amino Acid |
|----------|-----------------------------|-----------------|-------------------|-------------------------------------------------------------------|---------------------------|------------------|
| 2263     | NP                          | TCC             | TCT               | synonymous                                                        | S598                      | S                |
| 3833     | VP35                        | TTT             | TTC               | synonymous                                                        | F235                      | F                |
| 4433     | noncoding                   | C               | T                 | N/A                                                               |                           |                  |
| 4886     | VP40                        | AAT             | AAC               | synonymous                                                        | N136                      | N                |
| 4978     | VP40                        | CAA             | CTA               | nonsynonymous                                                     | Q167                      | L                |
| 6602     | GP - shared with FL and sGP | CAA             | CAG               | synonymous                                                        | Q188                      | Q                |
| 6924     | GP - shared with FL and sGP | AAA AAA ACC CTC | AAA AAA ACC -TC A | nonsynonymous - results in frame shift from full length GP to sGP | KKTL, full length GP tail | KKTS, sGP tail   |
| 7246     | full length GP              | CAA             | CAG               | synonymous                                                        | Q108                      | Q                |
| 8371     | noncoding                   | A               | G                 | N/A                                                               |                           |                  |
| 12403    | polymerase                  | ATG             | GTG               | nonsynonymous                                                     | M275                      | V                |
| 12568    | polymerase                  | GCC             | ACC               | nonsynonymous                                                     | A330                      | T                |
| 12750    | polymerase                  | AAA             | AAG               | synonymous                                                        | K390                      |                  |
| 13211    | polymerase                  | CAA             | CGA               | nonsynonymous                                                     | Q544                      | R                |
| 14411    | polymerase                  | GAG             | GGG               | nonsynonymous                                                     | E944                      | G                |
| 16821    | polymerase                  | TCA             | TCG               | synonymous                                                        | S1747                     | S                |
| 16928    | polymerase                  | ACC             | ATC               | nonsynonymous                                                     | T1783                     | I                |

**Table S2:** Evolutionary Pressure and iSNV Analysis, Related to Figure 3. **(TOP)** Likelihood ratio test statistics from PAML branch- and branch-site models. **(BOTTOM)** Effect of iSNV's from SLE Survivor 2 on viral coding and noncoding regions.

**Table S3:** Chimeric Reads from Sierra Leone and US EVD Survivors, and Cell Culture *in vitro* Infections, Related to Figure 4.

SIERRA LEONE EVD SURVIVORS:

| Survivor: | Days post Onset: | Specimen Number: | Chimera Type: | #Unique Deletions: | #Reads Chimeric: | Avg. # Reads Per Chimera: | Standard Deviation Reads Per Chimera | Total # Mapped Reads: | Proportion Mapped Chimeric Reads: |
|-----------|------------------|------------------|---------------|--------------------|------------------|---------------------------|--------------------------------------|-----------------------|-----------------------------------|
| 3         | 252              | VP1201500050     | Deletions     | 11                 | 57               | 5.1818                    | 4.9326                               | 225885                | 0.0003                            |
| 3         | 252              | VP1201500050     | SmallDups     | 4                  | 14               | 3.5                       | 1.5                                  | 225885                | 0.0001                            |
| 3         | 252              | VP1201500050     | LargeDups     | 8                  | 33               | 4.125                     | 4.3714                               | 225885                | 0.0001                            |
| 3         | 252              | VP1201500050     | CopyBacks     | 1                  | 4                | 4                         | 0                                    | 225885                | 0                                 |
| 3         | 259              | VP1201500100     | Deletions     | 9                  | 47               | 5.2222                    | 5.0723                               | 2210508               | 0                                 |
| 3         | 259              | VP1201500100     | LargeDups     | 13                 | 44               | 3.3846                    | 2.1318                               | 2210508               | 0                                 |
| 3         | 259              | VP1201500100     | CopyBacks     | 2                  | 2                | 1                         | 0                                    | 2210508               | 0                                 |
| 3         | 294              | VP1201500247     | Deletions     | 2                  | 21               | 10.5                      | 6.5                                  | 45989                 | 0.0005                            |
| 3         | 294              | VP1201500247     | SmallDups     | 2                  | 29               | 14.5                      | 4.5                                  | 45989                 | 0.0006                            |
| 3         | 294              | VP1201500247     | LargeDups     | 1                  | 2                | 2                         | 0                                    | 45989                 | 0                                 |
| 3         | 322              | VP1201500357     | Deletions     | 2                  | 23               | 11.5                      | 9.5                                  | 24405                 | 0.0009                            |
| 3         | 322              | VP1201500357     | LargeDups     | 1                  | 4                | 4                         | 0                                    | 24405                 | 0.0002                            |
| 4         | 143              | VP1201500033     | Deletions     | 3                  | 97               | 32.3333                   | 28.1227                              | 397245                | 0.0002                            |
| 4         | 143              | VP1201500033     | SmallDups     | 1                  | 20               | 20                        | 0                                    | 397245                | 0.0001                            |
| 4         | 143              | VP1201500033     | LargeDups     | 7                  | 198              | 28.2857                   | 27.7731                              | 397245                | 0.0005                            |
| 4         | 143              | VP1201500033     | CopyBacks     | 2                  | 54               | 27                        | 24                                   | 397245                | 0.0001                            |
| 4         | 157              | VP1201500118     | Deletions     | 1                  | 15               | 15                        | 0                                    | 328497                | 0                                 |
| 4         | 157              | VP1201500118     | SmallDups     | 6                  | 150              | 25                        | 21.7486                              | 328497                | 0.0005                            |
| 4         | 157              | VP1201500118     | LargeDups     | 3                  | 71               | 23.6667                   | 30.6522                              | 328497                | 0.0002                            |
| 4         | 172              | VP1201500193     | Deletions     | 12                 | 53               | 4.4167                    | 3.0127                               | 310225                | 0.0002                            |
| 4         | 172              | VP1201500193     | SmallDups     | 7                  | 37               | 5.2857                    | 3.3685                               | 310225                | 0.0001                            |
| 4         | 172              | VP1201500193     | LargeDups     | 23                 | 121              | 5.2609                    | 5.4231                               | 310225                | 0.0004                            |
| 4         | 172              | VP1201500193     | CopyBacks     | 3                  | 64               | 21.3333                   | 18.625                               | 310225                | 0.0002                            |
| 4         | 185              | VP1201500235     | Deletions     | 6                  | 10               | 1.6667                    | 1.1055                               | 5016545               | 0                                 |
| 4         | 185              | VP1201500235     | SmallDups     | 27                 | 154              | 5.7037                    | 4.8672                               | 5016545               | 0                                 |
| 4         | 185              | VP1201500235     | LargeDups     | 28                 | 215              | 7.6786                    | 10.1526                              | 5016545               | 0                                 |
| 4         | 185              | VP1201500235     | CopyBacks     | 5                  | 43               | 8.6                       | 7.3103                               | 5016545               | 0                                 |
| 4         | 199              | VP1201500293     | SmallDups     | 1                  | 28               | 28                        | 0                                    | 19305                 | 0.0015                            |
| 5         | 169              | VP1201500132     | Deletions     | 7                  | 35               | 5                         | 9.396                                | 3363725               | 0                                 |
| 5         | 169              | VP1201500132     | SmallDups     | 2                  | 43               | 21.5                      | 1.5                                  | 3363725               | 0                                 |
| 5         | 169              | VP1201500132     | LargeDups     | 3                  | 4                | 1.3333                    | 0.4714                               | 3363725               | 0                                 |
| 5         | 169              | VP1201500132     | CopyBacks     | 6                  | 6                | 1                         | 0                                    | 3363725               | 0                                 |
| 6         | 178              | VP1201500297     | SmallDups     | 1                  | 2                | 2                         | 0                                    | 28892                 | 0.0001                            |
| 6         | 178              | VP1201500297     | LargeDups     | 2                  | 11               | 5.5                       | 4.5                                  | 28892                 | 0.0004                            |
| 2         | 82               | VP1201500009     | Deletions     | 2                  | 11               | 5.5                       | 0.5                                  | 204315                | 0.0001                            |
| 2         | 82               | VP1201500009     | SmallDups     | 1                  | 11               | 11                        | 0                                    | 204315                | 0.0001                            |
| 2         | 82               | VP1201500009     | LargeDups     | 6                  | 99               | 9.8333                    | 8.1938                               | 204315                | 0.0003                            |
| 2         | 82               | VP1201500009     | CopyBacks     | 1                  | 1                | 1                         | 0                                    | 204315                | 0                                 |
| 2         | 96               | VP1201500046     | Deletions     | 14                 | 76               | 5.4286                    | 5.0244                               | 8123282               | 0                                 |
| 2         | 96               | VP1201500046     | SmallDups     | 7                  | 49               | 7                         | 10.1419                              | 8123282               | 0                                 |
| 2         | 96               | VP1201500046     | LargeDups     | 20                 | 111              | 5.55                      | 5.6963                               | 8123282               | 0                                 |
| 2         | 96               | VP1201500046     | CopyBacks     | 14                 | 81               | 5.7857                    | 8.6204                               | 8123282               | 0                                 |
| 2         | 103              | VP1201500084     | Deletions     | 35                 | 748              | 21.3714                   | 31.5722                              | 1153901               | 0.0006                            |
| 2         | 103              | VP1201500084     | SmallDups     | 71                 | 1262             | 17.7746                   | 28.1085                              | 1153901               | 0.0011                            |
| 2         | 103              | VP1201500084     | LargeDups     | 43                 | 682              | 15.8605                   | 17.2742                              | 1153901               | 0.0006                            |
| 2         | 103              | VP1201500084     | CopyBacks     | 72                 | 1208             | 16.7778                   | 44.6555                              | 1153901               | 0.001                             |
| 2         | 116              | VP1201500163     | Deletions     | 7                  | 78               | 11.1429                   | 7.8272                               | 550976                | 0.0001                            |
| 2         | 116              | VP1201500163     | SmallDups     | 6                  | 63               | 10.5                      | 9.4472                               | 550976                | 0.0001                            |
| 2         | 116              | VP1201500163     | LargeDups     | 4                  | 93               | 23.25                     | 37.963                               | 550976                | 0.0002                            |
| 2         | 116              | VP1201500163     | CopyBacks     | 1                  | 3                | 3                         | 0                                    | 550976                | 0                                 |
| 2         | 158              | VP1201500320     | Deletions     | 38                 | 80               | 2.1053                    | 1.5181                               | 5205496               | 0                                 |
| 2         | 158              | VP1201500320     | SmallDups     | 29                 | 154              | 5.3103                    | 8.9022                               | 5205496               | 0                                 |
| 2         | 158              | VP1201500320     | LargeDups     | 43                 | 379              | 8.814                     | 37.1911                              | 5205496               | 0.0001                            |
| 2         | 158              | VP1201500320     | CopyBacks     | 14                 | 399              | 28.5                      | 70.5111                              | 5205496               | 0.0001                            |
| 2         | 172              | VP1201500374     | Deletions     | 12                 | 319              | 26.5833                   | 56.1508                              | 5339682               | 0.0001                            |
| 2         | 172              | VP1201500374     | SmallDups     | 16                 | 1187             | 74.1875                   | 90.4898                              | 5339682               | 0.0002                            |
| 2         | 172              | VP1201500374     | LargeDups     | 20                 | 573              | 28.65                     | 35.1885                              | 5339682               | 0.0001                            |
| 2         | 172              | VP1201500374     | CopyBacks     | 11                 | 152              | 13.8182                   | 38.6472                              | 5339682               | 0                                 |
| 2         | 186              | VP1201500423     | Deletions     | 12                 | 69               | 5.75                      | 5.4333                               | 3188103               | 0                                 |
| 2         | 186              | VP1201500423     | SmallDups     | 15                 | 105              | 7                         | 5.379                                | 3188103               | 0                                 |
| 2         | 186              | VP1201500423     | LargeDups     | 13                 | 79               | 6.0769                    | 6.9222                               | 3188103               | 0                                 |
| 2         | 186              | VP1201500423     | CopyBacks     | 13                 | 42               | 3.2308                    | 4.509                                | 3188103               | 0                                 |



US EVD SURVIVORS:

| Survivor: | Days post Onset: | Specimen Type: | Specimen Number: | Chimera Type: | #Unique Deletions: | #Reads Chimeric: | Avg. # Reads Per Chimera: | Standard Deviation Reads Per Chimera | Total # Mapped Reads: | Proportion Mapped Chimeric Reads: |
|-----------|------------------|----------------|------------------|---------------|--------------------|------------------|---------------------------|--------------------------------------|-----------------------|-----------------------------------|
| A         | 28               | semen          | 201403120        | Deletions     | 1                  | 4                | 4                         | 0                                    | 145785                | 0                                 |
| A         | 28               | semen          | 201403120        | SmallDups     | 2                  | 33               | 16.5                      | 1.5                                  | 145785                | 0.0002                            |
| A         | 28               | semen          | 201403120        | LargeDups     | 8                  | 57               | 7.125                     | 3.8871                               | 145785                | 0.0004                            |
| A         | 58               | semen          | 201403184        | LargeDups     | 3                  | 266              | 88.6667                   | 62.4304                              | 192147                | 0.0014                            |
| C         | 5                | blood          | 201403131        | Deletions     | 42                 | 84               | 2                         | 1.291                                | 606711                | 0.0001                            |
| C         | 5                | blood          | 201403131        | SmallDups     | 45                 | 123              | 2.7333                    | 2.2549                               | 606711                | 0.0002                            |
| C         | 5                | blood          | 201403131        | LargeDups     | 57                 | 142              | 2.4912                    | 1.6975                               | 606711                | 0.0002                            |
| C         | 5                | blood          | 201403131        | CopyBacks     | 13                 | 13               | 1                         | 0                                    | 606711                | 0                                 |
| C         | 7                | blood          | 201403142        | Deletions     | 71                 | 102              | 1.4366                    | 1.1596                               | 583227                | 0.0002                            |
| C         | 7                | blood          | 201403142        | SmallDups     | 82                 | 107              | 1.3049                    | 0.7104                               | 583227                | 0.0002                            |
| C         | 7                | blood          | 201403142        | LargeDups     | 134                | 175              | 1.306                     | 0.7353                               | 583227                | 0.0003                            |
| C         | 7                | blood          | 201403142        | CopyBacks     | 34                 | 36               | 1.0588                    | 0.3379                               | 583227                | 0.0001                            |
| C         | 9                | blood          | 201403147        | Deletions     | 31                 | 57               | 1.8387                    | 0.8461                               | 524944                | 0.0001                            |
| C         | 9                | blood          | 201403147        | SmallDups     | 68                 | 129              | 1.8971                    | 2.3272                               | 524944                | 0.0002                            |
| C         | 9                | blood          | 201403147        | LargeDups     | 101                | 168              | 1.6634                    | 0.9676                               | 524944                | 0.0003                            |
| C         | 9                | blood          | 201403147        | CopyBacks     | 17                 | 18               | 1.0588                    | 0.2353                               | 524944                | 0                                 |
| C         | 12               | blood          | 201403162        | Deletions     | 13                 | 23               | 1.7692                    | 1.2499                               | 91224                 | 0.0003                            |
| C         | 12               | blood          | 201403162        | SmallDups     | 7                  | 7                | 1                         | 0                                    | 91224                 | 0.0001                            |
| C         | 12               | blood          | 201403162        | LargeDups     | 33                 | 39               | 1.1818                    | 0.3857                               | 91224                 | 0.0004                            |
| C         | 12               | blood          | 201403162        | CopyBacks     | 1                  | 1                | 1                         | 0                                    | 91224                 | 0                                 |
| C         | 27               | urine          | 201403234        | Deletions     | 11                 | 40               | 3.6364                    | 3.7725                               | 1201902               | 0                                 |
| C         | 27               | urine          | 201403234        | SmallDups     | 17                 | 452              | 26.5882                   | 61.5296                              | 1201902               | 0.0004                            |
| C         | 27               | urine          | 201403234        | LargeDups     | 38                 | 590              | 15.2663                   | 42.5989                              | 1201902               | 0.0005                            |
| C         | 27               | urine          | 201403234        | CopyBacks     | 1                  | 1                | 1                         | 0                                    | 1201902               | 0                                 |
| C         | 33               | urine          | 201403258        | SmallDups     | 1                  | 7                | 7                         | 0                                    | 877878                | 0                                 |
| C         | 45               | semen          | 201403360        | Deletions     | 2                  | 2                | 1                         | 0                                    | 837349                | 0                                 |
| C         | 45               | semen          | 201403360        | SmallDups     | 4                  | 4254             | 1063.5                    | 1832.2228                            | 837349                | 0.0051                            |
| C         | 45               | semen          | 201403360        | LargeDups     | 4                  | 4832             | 1208                      | 2064.102                             | 837349                | 0.0058                            |
| C         | 72               | semen          | 201403439        | Deletions     | 1                  | 2                | 2                         | 0                                    | 15350                 | 0.0001                            |
| C         | 72               | semen          | 201403439        | SmallDups     | 1                  | 4                | 4                         | 0                                    | 15350                 | 0.0003                            |
| C         | 72               | semen          | 201403439        | LargeDups     | 1                  | 3                | 3                         | 0                                    | 15350                 | 0.0002                            |
| C         | 101              | eye            | 201403522        | Deletions     | 108                | 151              | 1.3981                    | 0.8044                               | 1264908               | 0.0001                            |
| C         | 101              | eye            | 201403522        | SmallDups     | 92                 | 208              | 2.2609                    | 3.4385                               | 1264908               | 0.0002                            |
| C         | 101              | eye            | 201403522        | LargeDups     | 158                | 233              | 1.4747                    | 1.8235                               | 1264908               | 0.0002                            |
| C         | 101              | eye            | 201403522        | CopyBacks     | 2                  | 3                | 1.5                       | 0.5                                  | 1264908               | 0                                 |
| C         | 117              | semen          | 201403557        | SmallDups     | 1                  | 5                | 5                         | 0                                    | 7479                  | 0.0007                            |
| E         | 1                | blood          | 201403368        | Deletions     | 1                  | 1                | 1                         | 0                                    | 197384                | 0                                 |
| E         | 1                | blood          | 201403368        | LargeDups     | 2                  | 54               | 27                        | 6                                    | 197384                | 0.0003                            |
| E         | 1                | blood          | 201403368        | CopyBacks     | 1                  | 1                | 1                         | 0                                    | 197384                | 0                                 |
| E         | 2                | plasma         | 201403391        | Deletions     | 23                 | 75               | 3.2609                    | 2.6738                               | 631517                | 0.0001                            |
| E         | 2                | plasma         | 201403391        | SmallDups     | 21                 | 101              | 4.8095                    | 4.0897                               | 631517                | 0.0002                            |
| E         | 2                | plasma         | 201403391        | LargeDups     | 43                 | 149              | 3.4651                    | 2.5183                               | 631517                | 0.0002                            |
| E         | 2                | plasma         | 201403391        | CopyBacks     | 8                  | 8                | 1                         | 0                                    | 631517                | 0                                 |
| E         | 5                | plasma         | 201403394        | Deletions     | 5                  | 136              | 27.2                      | 18.7553                              | 297798                | 0.0005                            |
| E         | 5                | plasma         | 201403394        | SmallDups     | 9                  | 177              | 19.6667                   | 19.1079                              | 297798                | 0.0006                            |
| E         | 5                | plasma         | 201403394        | LargeDups     | 12                 | 128              | 10.6667                   | 10.3789                              | 297798                | 0.0004                            |
| E         | 5                | plasma         | 201403394        | CopyBacks     | 1                  | 1                | 1                         | 0                                    | 297798                | 0                                 |
| E         | 50               | semen          | 201403509        | Deletions     | 3                  | 9                | 3                         | 1.4142                               | 58765                 | 0.0002                            |
| E         | 50               | semen          | 201403509        | SmallDups     | 7                  | 11               | 1.5714                    | 0.9035                               | 58765                 | 0.0002                            |
| E         | 50               | semen          | 201403509        | LargeDups     | 8                  | 12               | 1.5                       | 1                                    | 58765                 | 0.0002                            |
| E         | 50               | semen          | 201403509        | CopyBacks     | 1                  | 2                | 2                         | 0                                    | 58765                 | 0                                 |

CELL CULTURE *in vitro* INFECTION

| Time Point: | MOI: | Chimera Type: | #Unique Deletions: | #Reads Chimeric: | Avg. # Reads Per Chimera: | Standard Deviation Reads Per Chimera: | Total # Mapped Reads: | Proportion Mapped Chimeric Reads: |
|-------------|------|---------------|--------------------|------------------|---------------------------|---------------------------------------|-----------------------|-----------------------------------|
| 1 hr        | 2.0  | Deletions     | 23                 | 298              | 12.9565                   | 48.7981                               | 159328                | 0.0019                            |
| 1 hr        | 2.0  | SmallDups     | 22                 | 32               | 1.4545                    | 0.6556                                | 159328                | 0.0002                            |
| 1 hr        | 2.0  | LargeDups     | 16                 | 20               | 1.25                      | 0.75                                  | 159328                | 0.0001                            |
| 1 hr        | 2.0  | CopyBacks     | 2                  | 3                | 1.5                       | 0.5                                   | 159328                | 0                                 |
| 18 hr       | 2.0  | Deletions     | 150                | 2865             | 19.1                      | 149.923                               | 438530                | 0.0065                            |
| 18 hr       | 2.0  | SmallDups     | 76                 | 87               | 1.1447                    | 0.622                                 | 438530                | 0.0002                            |
| 18 hr       | 2.0  | LargeDups     | 79                 | 95               | 1.2025                    | 0.5126                                | 438530                | 0.0002                            |
| 18 hr       | 2.0  | CopyBacks     | 58                 | 58               | 1                         | 0                                     | 438530                | 0.0001                            |
| 1 hr        | 0.2  | Deletions     | 4                  | 13               | 3.25                      | 3.3448                                | 14540                 | 0.0009                            |
| 1 hr        | 0.2  | SmallDups     | 3                  | 6                | 2                         | 1.4142                                | 14540                 | 0.0004                            |
| 1 hr        | 0.2  | LargeDups     | 1                  | 1                | 1                         | 0                                     | 14540                 | 0.0001                            |
| 48 hr       | 0.2  | Deletions     | 101                | 581              | 5.7525                    | 30.2145                               | 401382                | 0.0014                            |
| 48 hr       | 0.2  | SmallDups     | 82                 | 96               | 1.1707                    | 0.5589                                | 401382                | 0.0002                            |
| 48 hr       | 0.2  | LargeDups     | 99                 | 105              | 1.0606                    | 0.2386                                | 401382                | 0.0003                            |
| 48 hr       | 0.2  | CopyBacks     | 143                | 149              | 1.042                     | 0.2005                                | 401382                | 0.0004                            |

## 1 **SUPPLEMENTARY EXPERIMENTAL METHODS**

### 2 CONTACT FOR REAGENT AND RESOURCE SHARING

3 Further information and requests for reagents may be directed to, and will be fulfilled by the  
4 corresponding authors, Ute Ströher (ute.stroeh@ gmail.com) and Gustavo Palacios  
5 (gustavo.f.palacios.ctr@mail.mil).

### 6 EXPERIMENTAL MODEL AND SUBJECT DETAILS

#### 7 *Human Subjects*

8 Through the joint Sierra Leone Ebola Virus Persistence study (SLEVPS) with the Ministry of Health  
9 and Sanitation (MoHS) in Sierra Leone, WHO, China-CDC, and CDC, we had access to semen  
10 specimens collected from EVD survivors (Deen et al., 2015). Through this study we did not have access  
11 to direct patient data, such as patient age. Male study participants were stratified and selected for  
12 sequencing based on their NP Ct value and number/time span of serial semen specimens. As the  
13 SLEVPS only focused on specimen collection from EVD survivors, we did not have access to acute  
14 specimens from these participants. The SLEVPS was reviewed and approved by the Sierra Leone  
15 Institutional Review Board and the World Health Organization Ethical Review Committee. Following  
16 clinical diagnostic testing in the US, we did have access to paired acute blood and persistent semen  
17 specimens collected from US EVD patients. Acute and persistent specimens from US EVD survivors  
18 were collected by their treating physicians and transported to the CDC for detection of viral RNA (Kraft  
19 et al., 2015; Lyon et al., 2014; McElroy et al., 2015; Varkey et al., 2015). This sequencing project was  
20 determined by the CDC institutional human subject advisor to be a non-research public health response  
21 activity, and institutional review board review was not required.

### 22 METHOD DETAILS

#### 23 *Whole Genome Sequencing and Bioinformatics*

24 RNA was extracted from blood and semen specimens using MagMAX Pathogen RNA/DNA  
25 isolation kit (Invitrogen) and BeadRetriever (Invitrogen) and treated with recombinant DNase I RNase-  
26 free (Roche). Ribosomal and carrier RNA were removed as previously described (Matranga et al.,  
27 2014). Non-depleted and rRNA/carrier RNA depleted specimens were prepared for sequencing using a  
28 modified version of the Illumina TruSeq RNA Access Library Prep kit as described previously with  
29 some minor variations (Blackley et al., 2016; Levin et al., 2010; Mate et al., 2015; Parkhomchuk et al.,  
30 2009; Sultan et al., 2012; Wang et al., 2011). RNA was fragmented for one minute prior to cDNA  
31 synthesis and custom dual indexes were used to avoid any sequencer bleed-through (Kircher et al.,  
32 2012). All specimens were enriched separately to avoid any bias of enriching one or two libraries over  
33 others in a pool. Specimens were sequenced using a Illumina MiSeq (version 3, 2x151 cycles), an  
34 Illumina Nextseq500 (midoutput kit, 2x151 cycles), and an Illumina HiSeq 2500 (rapid run v2, 2x151  
35 cycles).

36 EBOV genomes were assembled by aligning reads to Ebola virus/H.sapiens-  
37 wt/SLE/2014/Makona-G3864.1 (KR013754, missing bases in the reference were replaced with  
38 consensus calls from complete EBOV genomes); this reference is equivalent to the basal SL2 haplotype  
39 (Gire et al., 2014). The priming sites of the random hexamer and Illumina TruSeq adaptors were  
40 removed from the sequencing reads using Cutadapt v1.21 (Martin, 2011) and low quality reads/bases  
41 were filtered using Prinseq-lite v0.20.4 (-min\_qual\_mean 25 -trim\_qual\_right 20 -min\_len 50)  
42 (Schmeider, 2011). Reads were aligned to the reference using Bowtie2 (Langmead and Salzberg, 2012),  
43 duplicates were removed with Picard (broadinstitute.github.io/picard) and a new consensus was  
44 generated using a combination of Samtools v0.1.18 (Li et al., 2009) and custom scripts. Only bases with  
45 Phred quality score  $\geq 20$  were utilized in consensus calling, and a minimum of 3x read-depth coverage,  
46 in support of the consensus, was required to make a call; positions lacking this depth of coverage were  
47 treated as missing (i.e., called as 'N'). Genomes acquired from clinical specimens were deposited into  
48 Genbank: KY401638-KY401675, KY805810-2.

50 *Analysis of Viral Evolutionary Rates*

51 Viral evolutionary rate estimates were conducted using both linear regression modeling and time-  
52 structured phylogenies. For SAVS from SLE survivors, 1,058 EBOV genomes from Sierra Leone were  
53 analyzed using Path-O-Gen (now called TempEst (Rambaut, 2016)) and a maximum likelihood tree  
54 (GTR+G) rooted on the earliest available Sierra Leone sequence. For SAVS from US EVD survivors,  
55 1498 genomes, representing a majority of sequences from Sierra Leone, Guinea and Liberia, were  
56 analyzed using Path-O-Gen (now called TempEst (Rambaut, 2016)) and a maximum likelihood tree  
57 (GTR+G) rooted on the earliest available Guinea sequence. Evolutionary rates and residual density  
58 plots were analyzed using R and custom python scripts from (Park et al., 2015). Evolutionary rate  
59 estimates for SAVS were also obtained using BEAST/v1.8.2, 1.8.3, 1.8.4 (Drummond et al., 2012). A  
60 random selection of viral sequences, representing 25% of available sequences from SLE, or  
61 SLE/LBR/GIN, were used for the Bayesian analysis by partitioning into concatenated coding and  
62 noncoding sites. Rate estimates were modeled using unlinked HKY nucleotide evolutionary models  
63 with 4-independent  $\Gamma$  distributions, Bayesian skygrid demographic model (with variable population  
64 model estimated between January 1, 2014 and January 1, 2016, ie – “Time at last point:2”; or constant  
65 population, ie – “Time at last point:0”), and fixed local clock (Yoder and Yang, 2000) or uncorrelated  
66 lognormal local clock (Drummond et al., 2006) set with an initial prior of  $1.1 \times 10^{-3}$  subs/site/year. Model  
67 comparisons were conducted using: 1) relaxed uncorrelated lognormal clock with no constraints on the  
68 tree prior, variable Skygrid population; 1) relaxed uncorrelated lognormal clock with no constraints on  
69 the tree prior, constant population: “UCLN<sub>unconstrained</sub>”; 2) relaxed uncorrelated lognormal clock with  
70 individual survivor blood and/or semen sequences constrained to survivor-specific monophyletic  
71 blood/semen taxons, constant population: “UCLN<sub>monophyletic</sub>”, 3) Fixed local clock with individual  
72 survivor blood and/or semen sequences constrained to survivor-specific monophyletic blood/semen  
73 taxons, constant population: and 4) Fixed local clock with survivor blood and/or semen sequences

74 constrained to blood-specific and semen-specific taxons, constant population: “FLC<sub>monophyletic</sub>”. The  
75 MCMC analysis was conducted for 800 million generations, which represents a compilation of 8-  
76 independent replicates of 100 million generations (sampled every 10,000<sup>th</sup> state). Convergence was  
77 obtained for the majority of replicates and burn-in was removed (usually 5-10% of total states) by  
78 examining the trace and effective sample size statistics (min ESS > 200 for all models) using tracer/v1.6.  
79 Strength of model fit was evaluated by performing path- and stepping stone-sampling with default  
80 values and best-of-fit was evaluated by calculating Bayes Factors. Survivor and acute rate estimates  
81 from Bayesian analysis conducted with the UCLN clock models were estimated using custom-modified  
82 *samogitia.py* scripts (Dudas, 2017).

83

#### 84 *Sequence Analysis*

85 Additional sequence analysis was conducted using CLC Genomics/v9.0. Potential hyper-edited sites  
86 due to host-encoded adenosine deaminases acting on RNA (ADARs) can result in the rapid  
87 accumulation of clustered T(U)-to-C substitutions (on the positive strand) in the EBOV genome (Dudas  
88 et al., 2017). We identified clusters of substitutions consistent with ADAR-mediated editing ( $\geq 3$   
89 phylogenetically-linked T(U)-to-C substitutions within a 200 nt window), and these substitutions were  
90 masked for evolutionary rate analyses (i.e., C genotypes were converted to T at these positions) in  
91 Figure 2A-B, and Figure 3A-B. Histograms of U-to-C hyper-editing were generated using R. Median  
92 joining networks were constructed using sequence alignments from each EVD survivor with  
93 PopART/v1.7.2. Intrahost variants (iSNVs) were detected with FreeBayes v1.0.2 (Garrison, 2012). For  
94 iSNV detection, we only used reads with mapping quality  $\geq 30$  and positions with base quality  $\geq 30$ . An  
95 iSNV was only considered if the alternate allele was represented by  $\geq 5$  reads and present at a frequency  
96  $\geq 3\%$ . We estimated SNV and insertion frequencies for the longitudinal phasing analysis by first  
97 performing a read-pair merging of the assemblies in IRMA v0.6.5 (Shepard et al., 2016) and computing  
98 allele frequencies for each selected site using IRMA’s *call.pl* script ( $-B$  option). A pairwise (Manhattan)

99 distance matrix was computed in R v3.3.1 for each position-allele combination with the vector of the  
100 observed frequencies ordered by specimen date. The matrix was used to generate a single linkage  
101 dendrogram, also in R. SNVs were divided into two clusters based on two near-symmetrical branches in  
102 the tree. The insertion frequency of C at upstream position 6924 and its complement were added to the  
103 dataset and a second dendrogram produced. The 6924 C-insert and 6924 non-C-insert frequencies were  
104 assigned an SNV cluster according to their nearest neighboring SNV in the second tree: 8371G and  
105 8371A respectively. A final tree and distance matrix was produced for each variant position by ordering  
106 the frequency vectors by specimen date as well as variant cluster (one allele or insertion state was  
107 assigned to each cluster for each site). Frequency line graphs of positions, alleles, and specimen dates  
108 were created using Tableau v10.0 and the positions in the graph ordered and composited with the final R  
109 dendrogram in Supplementary Figure 3. Identification of chimeric reads were performed by mapping  
110 reads to Ebola virus/H.sapiens-wt/SLE/2014/Makona-G3864.1 (KR013754, missing bases in the  
111 reference were replaced with consensus calls from complete EBOV genomes) using bwa and chimeric  
112 reads were further defined using custom scripts. US EVD survivors received multiple therapeutic  
113 treatments (A: whole blood transfusion, convalescent whole blood transfusion, ZMAPP; C: TKM-  
114 Ebola, convalescent plasma; E: Convalescent plasma, brincidofovir)(Kraft et al., 2015; Lyon et al.,  
115 2014; McElroy et al., 2015; Varkey et al., 2015) and we confirmed that viral regions targeted by these  
116 compounds (GP, VP35, polymerase) did not mutate through comparison of serial consensus viral  
117 sequences.

118

### 119 *Estimation of Selective Pressure*

120 Evolutionary selective pressures were estimated using the renaissance counting method in beast/v1.8.2  
121 (Lemey et al., 2012; O'Brien et al., 2009) with a subset of genomes representing 25% of available  
122 random sequences from Sierra Leone, Guinea, and Liberia that did not contain codon frame shifts.

123 Codon alignments for each gene were partitioning into coding and concatenated total noncoding sites.  
124 Rate estimates were modeled using unlinked HKY nucleotide substitution models, Bayesian skygrid  
125 demographic model, and uncorrelated lognormal relaxed clock set with an initial prior of  $1.1 \times 10^{-3}$   
126 subs/site/year. The MCMC analysis was conducted for 400 million generations for each gene, which  
127 represents a compilation of 4-independent replicates of 100 million generations (sampled every 1000<sup>th</sup>  
128 state). Due to time constraints, MCMC analysis for the VP40 and polymerase gene were stopped at  
129 ~200 million or ~120 million iterations, which easily reached convergence. For all replicates,  
130 convergence was obtained and burn-in was removed (usually 10% of total states) by examining the trace  
131 and effective sample size statistics (>200 for all MCMC analyses) using tracer/v1.6. Only one MCMC  
132 replicate for the CGP tail did not converge, and it was removed from additional analysis. Omega  
133 estimates were calculated by using the conditioned and unconditioned N and S estimates and equation 1  
134  $((\text{total\_N}/\text{total\_S}) / (\text{unconditioned\_N}/\text{unconditioned\_S}))$  from Lemey *et al.* (Lemey et al., 2012) and  
135 scripts from Park *et al.* (Park et al., 2015). To prevent rate overestimation by double-counting shared  
136 amino acids, the glycoprotein was split at the transcriptional editing site (nucleotide 6923) into N-  
137 terminal (nucleotides 6039-6923, “NGP”), C-terminal full length (nucleotides 6923-8068 - containing  
138 the GP1 carboxy-terminus and GP2, “CGP”) and secreted GP (nucleotides 6924-7157, “SGP<sub>c</sub>”). For  
139 secreted GP (nucleotides 6924-7157, “SGP<sub>c</sub>”) rate estimates, approximately 9.6% of unconditioned S  
140 estimates and 0.2% of unconditioned N estimates were 0.0; thus to bypass undefined  $\omega$  estimates these  
141 values were converted to 1. For polymerase rate estimates, approximately 3% of N or S estimates were  
142 undefined (NaN) and to bypass undefined  $\omega$  estimates these states were removed from the analysis.

143

144 Selective pressure hypothesis testing was performed using the codeml model in paml/v4.5 with a subset  
145 of 231 genomes, representing approximately 25% of available random sequences from Sierra Leone,  
146 Guinea and Liberia that did not contain reading frame shifts. We constructed a Maximum Clade

147 Credibility tree using beast/v.1.8.2 by partitioning the alignments into concatenated coding and  
148 noncoding sites and trees were modeled using unlinked HKY nucleotide substitution models, Bayesian  
149 skygrid demographic model, and uncorrelated lognormal relaxed clock set with an initial prior of  
150  $1.1 \times 10^{-3}$  subs/site/year. The MCMC analysis was conducted for 50 million generations (sampled every  
151 1000<sup>th</sup> state), which easily reached convergence. The cladogram of the MCC tree was used as input for  
152 paml codeml. Branch model testing was performed using model0 and model2 and branch-site testing  
153 was performed using modelA and A\_null with codon frequencies F3x4. For branch testing, kappa and  
154 omega estimates from model0 were set as initial estimates for model2 (acute sequences vs. SAVS) and  
155 model2 (acute sequences vs. SAVS\_acute\_rate vs. SAVS\_slow\_rate). Strength of statistical support for  
156 models2 (alternative hypotheses) vs. model0 (null hypothesis) was measured using the  $2\Delta\log$ -likelihood  
157 method with degrees of freedom=1 and further corrected according to Bonferroni ( $p = 0.05/2$  tests  
158 conducted with same sequence alignment) (Anisimova and Yang, 2007; Yang, 2007). The ratio of N to  
159 S was calculated by summing the total N ( $N \cdot dN$  from PAML model2 output) and S ( $S \cdot dS$  from PAML  
160 model2 output) estimates for all acute and SAVS branches and dividing by the total N and S count. For  
161 branch-site testing, semen-specific branches were set as foreground branches and modelA was  
162 performed using NSsites=2 with kappa and omega estimates set at initial values from model0.  
163 ModelA\_null testing was performed with NSsites=2, kappa and omega estimates set at initial values  
164 from model0, and omega fixed at 1. Significance values were calculated using the  $2\Delta\log$ -likelihood  
165 method and significance was established with p values below 0.05.

166

### 167 *Ebola virus in vitro Infection*

168 All work with EBOV was performed in a biosafety level 4 (BSL-4) facility. Huh7 cells were cultured in  
169 Dulbecco's modified Eagle's medium high glucose (DMEM) (item number 11960-044, Invitrogen)  
170 supplemented with 10% heat inactivated HyClone fetal bovine serum (Thermo Scientific), 1x non-



171 essential amino acids (Invitrogen), 1x penicillin-streptomycin (Invitrogen), and 1x Glutamax  
172 (Invitrogen) at 37°C with 5% CO<sub>2</sub>. Prior to viral infection, cells were seeded into triplicate wells in a  
173 12-well plate and media was replaced with FluorBrite Dulbecco's modified Eagle's medium (DMEM)  
174 (item number A1896701, Invitrogen) supplemented with 10% heat inactivated HyClone fetal bovine  
175 serum (Thermo Scientific), 1x non-essential amino acids (Invitrogen), 1x penicillin-streptomycin  
176 (Invitrogen), and 1x Glutamax (Invitrogen). Immediately before infection cells were counted using the  
177 Moxi Z cell counter with M cassettes (Orflo, Technologies). Cells were infected at MOI of 2 or 0.2 with  
178 rEBOV-L2014/ZsG (Albarino et al., 2016) in 200uL of FluorBrite media with supplements for 1 hour at  
179 37°C with 5% CO<sub>2</sub>. After absorption, inoculum was removed and cells were washed twice with 1mL of  
180 PBS. Media was replaced with FluorBrite media for infection duration. At specified time points  
181 supernatant and monolayers were inactivated with TriPure isolation reagent (Roche). Prior to  
182 inactivation supernatants were spun at 200xg for 10 minutes to remove cellular debris. RNA was  
183 extracted from Tripure using the Direct-zol-96 MagBead RNA isolation kit (Zymo Research). Active  
184 viral infection of cells was confirmed by visualization of ZsGreen fluorescence at 1, 18, and 48 hours  
185 post infection.

186

### 187 *Ebola virus RNA Strandedness Analysis*

188 The TruSeq RNA Access Library Prep kit results in stranded data (i.e., read 1 is complementary  
189 to the original RNA molecule). Using custom scripts we quantified the proportion of positive- and  
190 negative-sense RNA molecules present in each specimen. Independently for each strand and each  
191 specimen, we also calculated relative depth of coverage for every EBOV ORF as

192

$$\hat{D}_j = \frac{\frac{1}{n_j} \sum_{i=1}^{n_j} D_{ji}}{\frac{1}{N} \sum_{j=1}^N \frac{1}{n_j} \sum_{i=1}^{n_j} D_{ji}}$$

193 N is the total number of ORFs,  $n_j$  is the length in nucleotides of the  $j^{\text{th}}$  ORF and  $D_{ji}$  is the read 1 depth  
194 of coverage at the  $i^{\text{th}}$  nucleotide of the  $j^{\text{th}}$  ORF. Only read 1 was used to avoid double counting at  
195 positions where reads 1 and 2 overlap. Regions of the genome included in multiple ORFs were  
196 excluded. In Figure 4, strandedness data from next generation sequencing is presented either for 1)  
197 specific genes (Figures 4D, Supplementary Figures 5F and 5G), 2) whole genome sequences (Figures  
198 4A-C, and Supplementary Figures 5A-C), or 3) for the NP-specific open reading frame (Supplementary  
199 Figures 6A-D). Cutoff criteria was  $\geq 50x$  average paired end coverage across the genome for Figures  
200 4A-C and Supplementary Figures 5A-C,  $\geq 25x$  average read 1 coverage across the coding portions of the  
201 genome (Figure 4D and Supplementary Figure 5F), and  $\geq 25x$  average read 1 coverage across NP  
202 (Supplementary Figure 6A-D).

203 The EBOV NP strand-specific qRT-PCR assay was performed by using separate first and second  
204 strand reactions. The first-strand reaction was conducted with 2.5uL of input RNA, 1uL 10mM dNTPs  
205 (Invitrogen), 1uL of 2uM gene-specific tagged stranded primer and 5uL of nuclease-free water  
206 (Ambion). This mixture was heated to 65°C for 5 minutes and placed on ice for 2 minutes. The reverse  
207 transcription reaction followed with 4uL of 5x first-strand reaction buffer (Invitrogen), 1uL SUPERase-  
208 In (Invitrogen), 1uL superscript III reverse transcriptase (Invitrogen), 1uL 0.1M DTT (Invitrogen) and  
209 3.5 uL of nuclease-free water (Ambion). The reaction was heated at 55°C for 15 minutes and cooled on  
210 ice for 2 minutes. First strand reactions were cleaned with the QiaQuick PCR cleanup kit (Qiagen) and  
211 ssDNA was eluted with 30uL of nuclease-free water (Ambion). The second strand reaction proceeded  
212 with 5uL of input cDNA, 2.5uL of AmpliTaq 10x buffer I, 0.5uL of 10mM dNTP's (Invitrogen), 2.25uL  
213 of 10uM tag-specific primer, 2.25uL of 10uM gene-specific primer, 0.625uL of 10uM NP probe,  
214 0.125uL of AmpliTaq DNA polymerase (Invitrogen), and 11.75uL of nuclease-free water (Ambion).  
215 Thermocycler conditions consisted of 50°C for 15 minutes, 95°C for 2 minutes, 95°C for 15s and 55°C  
216 for 45s (44 cycles). To convert Ct values into strand copy numbers, we established a Ct versus molarity

217 concentration curves for both positive- and negative-sense synthetic RNA's. Goodness-of-fit values for  
218 these curves ( $r^2$ ) were all greater than 0.988. Using the same first-strand cDNA products, we also  
219 established Ct versus copy number using the Bio-Rad QX200 digital droplet PCR and  $r^2$  values for these  
220 curves were all greater than 0.979. Reaction conditions for ddPCR consisted of 10uL of 2x ddPCR  
221 Supermix for Probes (Bio-Rad), 1.8uL of 10uM tag-specific primer, 1.8uL of 10uM gene-specific  
222 primer, 0.5uL of 10 uM NP-specific probe, uL of cDNA, and 0.9uL of nuclease-free water (Ambion).  
223 Thermocycler conditions consisted of 95°C for 10 minutes, 94°C for 30s, 60°C for 1 minute (39 cycles),  
224 and 98°C for 10 minutes with a ramp speeds done at 2°C/sec. Final Ct to copy number conversions for  
225 *in vitro* infections and EVD survivors clinical specimens were calculated using the Ct versus molarity  
226 concentration curves corrected for copy numbers as estimated using ddPCR.

227

## 228 QUANTIFICATION AND STATISTICAL ANALYSIS

229 For evolutionary rate estimates using Bayesian analysis we present the mean and 95% highest posterior  
230 density estimates calculated from all total combined states (after removal of burn-in, in most cases 10%)  
231 using scripts from Park et al. and custom-modified samogitia.py scripts (Dudas, 2017; Park et al., 2015).  
232 Evolutionary rates estimates from RTT's are presented as the line of best fit with 95% confidence  
233 intervals shaded in grey. Residual comparisons from linear regressions display the 2-fold standard  
234 deviations of the acute residual density in grey. Strength of statistical support for paml estimation of  
235 selective pressure was measured using the likelihood ratio test with degrees of freedom=1 comparing  
236 model0 (null hypothesis) with model2 (alternative hypotheses). Significance values for modelA and  
237 modelA\_null branch-site testing with PAML were calculated using the  $2\Delta\log$ -likelihood method and  
238 significance was established with p values below 0.05. A one-way analysis of variance (ANOVA) for  
239 the association of proportion of positive-sense reads or NP Ct values vs. virus isolation result was  
240 assessed using the `lm()` and `anova()` functions from R v3.3.1.

241

242 DATA AND SOFTWARE AVAILABILITY

243 Most software utilized is freely available, and when possible we include the version number and  
244 reference for the software used. Custom scripts have been submitted to github  
245 (<https://github.com/jtladner/Scripts> and [https://github.com/evk3/EBOV\\_semen\\_sequencing](https://github.com/evk3/EBOV_semen_sequencing)). Genomes  
246 acquired from clinical specimens were deposited into Genbank: KY401638-KY401675 and KY805810-  
247 2.

248 REFERENCES:

- 249 Albarino, C.G., Guerrero, L.W., Chakrabarti, A.K., Kainulainen, M.H., Whitmer, S.L., Welch, S.R., and Nichol, S.T.  
250 (2016). Virus fitness differences observed between two naturally occurring isolates of Ebola virus Makona  
251 variant using a reverse genetics approach. *Virology* 496, 237-243.
- 252 Anisimova, M., and Yang, Z. (2007). Multiple hypothesis testing to detect lineages under positive selection that  
253 affects only a few sites. *Mol Biol Evol* 24, 1219-1228.
- 254 Blackley, D.J., Wiley, M.R., Ladner, J.T., Fallah, M., Lo, T., Gilbert, M.L., Gregory, C., D'Ambrozio, J., Coulter, S.,  
255 Mate, S., *et al.* (2016). Reduced evolutionary rate in reemerged Ebola virus transmission chains. *Sci Adv* 2,  
256 e1600378.
- 257 Deen, G.F., Knust, B., Broutet, N., Sesay, F.R., Formenty, P., Ross, C., Thorson, A.E., Massaquoi, T.A., Murrain,  
258 J.E., Ervin, E., *et al.* (2015). Ebola RNA Persistence in Semen of Ebola Virus Disease Survivors - Preliminary Report.  
259 *The New England journal of medicine*.
- 260 Drummond, A.J., Ho, S.Y., Phillips, M.J., and Rambaut, A. (2006). Relaxed phylogenetics and dating with  
261 confidence. *PLoS Biol* 4, e88.
- 262 Drummond, A.J., Suchard, M.A., Xie, D., and Rambaut, A. (2012). Bayesian phylogenetics with BEAUti and the  
263 BEAST 1.7. *Mol Biol Evol* 29, 1969-1973.
- 264 Dudas, G. (2017). BALTIC - adaptable lightweight tree import code for molecular phylogeny manipulation,  
265 analysis and visualisation ([github.com](https://github.com)).
- 266 Dudas, G., Carvalho, L.M., Bedford, T., Tatem, A.J., Baele, G., Faria, N.R., Park, D.J., Ladner, J.T., Arias, A., Asogun,  
267 D., *et al.* (2017). Virus genomes reveal factors that spread and sustained the Ebola epidemic. *Nature* 544, 309-  
268 315.
- 269 Garrison, E.a.M., G. (2012). Haplotype-based variant detection from short-read sequencing. *arXiv 1207.3907 [q-  
270 bio.GN]*
- 271 Gire, S.K., Goba, A., Andersen, K.G., Sealfon, R.S., Park, D.J., Kanneh, L., Jalloh, S., Momoh, M., Fullah, M., Dudas,  
272 G., *et al.* (2014). Genomic surveillance elucidates Ebola virus origin and transmission during the 2014 outbreak.  
273 *Science* 345, 1369-1372.
- 274 Kircher, M., Sawyer, S., and Meyer, M. (2012). Double indexing overcomes inaccuracies in multiplex sequencing  
275 on the Illumina platform. *Nucleic Acids Res* 40, e3.
- 276 Kraft, C.S., Hewlett, A.L., Koepsell, S., Winkler, A.M., Kratochvil, C.J., Larson, L., Varkey, J.B., Mehta, A.K., Lyon,  
277 G.M., 3rd, Friedman-Moraco, R.J., *et al.* (2015). The Use of TKM-100802 and Convalescent Plasma in 2 Patients  
278 With Ebola Virus Disease in the United States. *Clin Infect Dis* 61, 496-502.
- 279 Langmead, B., and Salzberg, S.L. (2012). Fast gapped-read alignment with Bowtie 2. *Nat Methods* 9, 357-359.

280 Lemey, P., Minin, V.N., Bielejec, F., Kosakovsky Pond, S.L., and Suchard, M.A. (2012). A counting renaissance:  
281 combining stochastic mapping and empirical Bayes to quickly detect amino acid sites under positive selection.  
282 *Bioinformatics* 28, 3248-3256.

283 Levin, J.Z., Yassour, M., Adiconis, X., Nusbaum, C., Thompson, D.A., Friedman, N., Gnirke, A., and Regev, A.  
284 (2010). Comprehensive comparative analysis of strand-specific RNA sequencing methods. *Nat Methods* 7, 709-  
285 715.

286 Li, H., Handsaker, B., Wysoker, A., Fennell, T., Ruan, J., Homer, N., Marth, G., Abecasis, G., Durbin, R., and  
287 Genome Project Data Processing, S. (2009). The Sequence Alignment/Map format and SAMtools. *Bioinformatics*  
288 25, 2078-2079.

289 Lyon, G.M., Mehta, A.K., Varkey, J.B., Brantly, K., Plyler, L., McElroy, A.K., Kraft, C.S., Towner, J.S., Spiropoulou,  
290 C., Stroher, U., *et al.* (2014). Clinical care of two patients with Ebola virus disease in the United States. *The New*  
291 *England journal of medicine* 371, 2402-2409.

292 Martin, M. (2011). Cutadapt removes adaptor sequences from high-throughput sequences reads. *EMBnetjournal*  
293 17, 10-12.

294 Mate, S.E., Kugelman, J.R., Nyenswah, T.G., Ladner, J.T., Wiley, M.R., Cordier-Lassalle, T., Christie, A., Schroth,  
295 G.P., Gross, S.M., Davies-Wayne, G.J., *et al.* (2015). Molecular Evidence of Sexual Transmission of Ebola Virus.  
296 *The New England journal of medicine* 373, 2448-2454.

297 Matranga, C.B., Andersen, K.G., Winnicki, S., Busby, M., Gladden, A.D., Tewhey, R., Stremlau, M., Berlin, A., Gire,  
298 S.K., England, E., *et al.* (2014). Enhanced methods for unbiased deep sequencing of Lassa and Ebola RNA viruses  
299 from clinical and biological samples. *Genome Biol* 15, 519.

300 McElroy, A.K., Akondy, R.S., Davis, C.W., Ellebedy, A.H., Mehta, A.K., Kraft, C.S., Lyon, G.M., Ribner, B.S., Varkey,  
301 J., Sidney, J., *et al.* (2015). Human Ebola virus infection results in substantial immune activation. *Proc Natl Acad*  
302 *Sci U S A* 112, 4719-4724.

303 O'Brien, J.D., Minin, V.N., and Suchard, M.A. (2009). Learning to count: robust estimates for labeled distances  
304 between molecular sequences. *Mol Biol Evol* 26, 801-814.

305 Park, D.J., Dudas, G., Wohl, S., Goba, A., Whitmer, S.L., Andersen, K.G., Sealfon, R.S., Ladner, J.T., Kugelman, J.R.,  
306 Matranga, C.B., *et al.* (2015). Ebola Virus Epidemiology, Transmission, and Evolution during Seven Months in  
307 Sierra Leone. *Cell* 161, 1516-1526.

308 Parkhomchuk, D., Borodina, T., Amstislavskiy, V., Banaru, M., Hallen, L., Krobitch, S., Lehrach, H., and Soldatov,  
309 A. (2009). Transcriptome analysis by strand-specific sequencing of complementary DNA. *Nucleic Acids Res* 37,  
310 e123.

311 Rambaut, A., Lam, T.T., Carvalho, L.M., Pybus, O.G. (2016). Exploring the temporal structure of heterochronous  
312 sequences using TempEst (formerly Path-O-Gen). *Virus Evolution*, vew007.

313 Schmeider, R.a.E., R (2011). Quality Control and preprocessing of metagenomics datasets. *Bioinformatics* 27,  
314 863-864.

315 Shepard, S.S., Meno, S., Bahl, J., Wilson, M.M., Barnes, J., and Neuhaus, E. (2016). Viral deep sequencing needs  
316 an adaptive approach: IRMA, the iterative refinement meta-assembler. *BMC Genomics* 17, 708.

317 Sultan, M., Dokel, S., Amstislavskiy, V., Wuttig, D., Sultmann, H., Lehrach, H., and Yaspo, M.L. (2012). A simple  
318 strand-specific RNA-Seq library preparation protocol combining the Illumina TruSeq RNA and the dUTP methods.  
319 *Biochem Biophys Res Commun* 422, 643-646.

320 Varkey, J.B., Shantha, J.G., Crozier, I., Kraft, C.S., Lyon, G.M., Mehta, A.K., Kumar, G., Smith, J.R., Kainulainen,  
321 M.H., Whitmer, S., *et al.* (2015). Persistence of Ebola Virus in Ocular Fluid during Convalescence. *The New*  
322 *England journal of medicine*.

323 Wang, L., Si, Y., Dedow, L.K., Shao, Y., Liu, P., and Brutnell, T.P. (2011). A low-cost library construction protocol  
324 and data analysis pipeline for Illumina-based strand-specific multiplex RNA-seq. *PLoS One* 6, e26426.

325 Yang, Z. (2007). PAML 4: phylogenetic analysis by maximum likelihood. *Mol Biol Evol* 24, 1586-1591.

326 Yoder, A.D., and Yang, Z. (2000). Estimation of primate speciation dates using local molecular clocks. *Mol Biol*  
327 *Evol* 17, 1081-1090.

| <b>REAGENT or RESOURCE</b>                                       | <b>SOURCE</b>            | <b>IDENTIFIER</b>             |
|------------------------------------------------------------------|--------------------------|-------------------------------|
| <b><i>Chemicals, Peptides, and Recombinant Proteins</i></b>      |                          |                               |
| Dnase I, RNase-free                                              | Roche                    | 4716728001                    |
| Hybridase, RNase H                                               | Epicentre                | H39100                        |
| Qiagen RNase-free Dnase I                                        | Qiagen                   | 79254                         |
| Superase-in                                                      | Ambion                   | AM1694                        |
| Agencourt RNAClean XP SPRI clean up beads                        | Beckman Coulter Genomics | 41105518                      |
| Dulbecco's modified Eagle's medium high glucose (DMEM)           | Invitrogen               | 11960-044                     |
| HyClone fetal bovine serum                                       | Thermo Scientific        | SH30070.03                    |
| 100x Non-essential amino acids                                   | Invitrogen               | 11140050                      |
| 10,000 U/mL Penicillin-streptomycin                              | Invitrogen               | 15140122                      |
| GlutaMAX                                                         | Invitrogen               | 35050061                      |
| FluoroBrite FluorBrite Dulbecco's modified Eagle's medium (DMEM) | Invitrogen               | A1886701                      |
| TriPure Isolation reagent                                        | Roche                    | 11667165001                   |
| <b><i>Critical Commercial Assays</i></b>                         |                          |                               |
| MagMax Pathogen RNA/DNA Isolation Kit                            | Invitrogen               | 4462359                       |
| Direct-zop-96 MagBead RNA Isolation Kit                          | Zymo Research            |                               |
| TruSeq RNA Access Library Prep kit                               | Illumina                 | RS-301-2001                   |
| MiSeq Reagent Kit vs (300 cycle)                                 | Illumina                 | MS-102-2002                   |
| HiSeq Rapid PE Cluster Kit v2                                    | Illumina                 | PE-402-4002                   |
| TruSeq Rapid Duo cBot v1 Sample loading kit                      | Illumina                 | CT-402-4001                   |
| Moxi Z cell counter, M cassettes                                 | Orflo Technologies       | MXC001                        |
| <b><i>Deposited Data</i></b>                                     |                          |                               |
| EBOV genomics from clinical specimens                            | This study               | KY401638-KY401675, KY805810-2 |

| <b>Experimental Models: Cell Lines</b>           |                                                                                                                                                                                                                                                                                                              |                         |
|--------------------------------------------------|--------------------------------------------------------------------------------------------------------------------------------------------------------------------------------------------------------------------------------------------------------------------------------------------------------------|-------------------------|
| Huh7 cells                                       | Albarino, C.G., Guerrero, L.W., Chakrabarti, A.K., Kainulainen, M.H., Whitmer, S.L., Welch, S.R., and Nichol, S.T. (2016). Virus fitness differences observed between two naturally occurring isolates of Ebola virus Makona variant using a reverse genetics approach. <i>Virology</i> 496, 237-243.        |                         |
|                                                  |                                                                                                                                                                                                                                                                                                              |                         |
| <b>Experimental Models: Organisms/Strains</b>    |                                                                                                                                                                                                                                                                                                              |                         |
| rEBOV-L2014/ZsG                                  | Albarino, C.G., Guerrero, L.W., Chakrabarti, A.K., Kainulainen, M.H., Whitmer, S.L., Welch, S.R., and Nichol, S.T. (2016). Virus fitness differences observed between two naturally occurring isolates of Ebola virus Makona variant using a reverse genetics approach. <i>Virology</i> 496, 237-243.        |                         |
|                                                  |                                                                                                                                                                                                                                                                                                              |                         |
| <b>Sequence-Based Reagents</b>                   |                                                                                                                                                                                                                                                                                                              |                         |
| rRNA-specific DNA probes                         | Adiconis X, Borges-Rivera D, Satija R, DeLuca DS, Busby MA, Berlin AM, Sivachenko A, Thompson DA, Wysoker A, Fennell T, Gnirke A, Pochet N, Regev A, Levin JZ: Comparative analysis of RNA sequencing methods for degraded or low-input samples. <i>Nat Methods</i> . 2013, 10: 623-629. 10.1038/nmeth.2483. |                         |
| Oligo dT, 40 nucleotides                         | idtdna.com                                                                                                                                                                                                                                                                                                   |                         |
| Ebola virus-specific custom hybridization probes | Mate, S.E., Kugelman, J.R., Nyenswah, T.G., Ladner, J.T., Wiley, M.R., Cordier-Lassalle, T., Christie, A., Schroth, G.P., Gross, S.M., Davies-Wayne, G.J., et al. (2015). Molecular Evidence of Sexual Transmission of Ebola Virus. <i>The New England journal of medicine</i> 373, 2448-2454.               |                         |
| Positive-sense NP synthetic RNA                  | This study.                                                                                                                                                                                                                                                                                                  | Available upon request. |
| Negative-sense NP synthetic RNA                  | This study.                                                                                                                                                                                                                                                                                                  | Available upon request. |
| NP forward_tagged strand-specific primer         | This study.                                                                                                                                                                                                                                                                                                  | Available upon request. |
| NP reverse_tagged strand-specific primer         | This study.                                                                                                                                                                                                                                                                                                  | Available upon request. |
| Forward tagged primer                            | This study.                                                                                                                                                                                                                                                                                                  | Available upon request. |
| Reverse tagged primer                            | This study.                                                                                                                                                                                                                                                                                                  | Available upon request. |
| NP-specific probe                                | This study.                                                                                                                                                                                                                                                                                                  | Available upon request. |
|                                                  |                                                                                                                                                                                                                                                                                                              |                         |
| <b>Software and Algorithms</b>                   |                                                                                                                                                                                                                                                                                                              |                         |
| Cutadapt v1.21                                   | Martin, M. (2011). Cutadapt removes adaptor sequences from high-throughput sequences reads. <i>EMBnetjournal</i> 17, 10-12.                                                                                                                                                                                  |                         |

|                                                     |                                                                                                                                                                                                                                                                              |  |
|-----------------------------------------------------|------------------------------------------------------------------------------------------------------------------------------------------------------------------------------------------------------------------------------------------------------------------------------|--|
| Prinseq-lite v0.20.4                                | Schmeider, R.a.E., R (2011). Quality Control and preprocessing of metagenomics datasets. <i>Bioinformatics</i> 27, 863-864.                                                                                                                                                  |  |
| Bowtie2                                             | Langmead, B., and Salzberg, S.L. (2012). Fast gapped-read alignment with Bowtie 2. <i>Nat Methods</i> 9, 357-359.                                                                                                                                                            |  |
| Picard                                              | <a href="http://broadinstitute.github.io/picard">broadinstitute.github.io/picard</a>                                                                                                                                                                                         |  |
| Samtools v0.1.18                                    | Li, H., Handsaker, B., Wysoker, A., Fennell, T., Ruan, J., Homer, N., Marth, G., Abecasis, G., Durbin, R., and Genome Project Data Processing, S. (2009). The Sequence Alignment/Map format and SAMtools. <i>Bioinformatics</i> 25, 2078-2079.                               |  |
| Path-O-Gen (now called TempEst)                     | Rambaut, A., Lam, T.T., Carvalho, L.M., Pybus, O.G. (2016). Exploring the temporal structure of heterochronous sequences using TempEst (formerly Path-O-Gen). <i>Virus Evolution</i> , vew007.                                                                               |  |
| R v3.3.1                                            | R Core Team RfSC: R: A Language and Environment for Statistical Computing. In. Vienna, Austria; 2012.                                                                                                                                                                        |  |
| Custom Python scripts                               | Park, D.J., Dudas, G., Wohl, S., Goba, A., Whitmer, S.L., Andersen, K.G., Sealfon, R.S., Ladner, J.T., Kugelman, J.R., Matranga, C.B., et al. (2015). Ebola Virus Epidemiology, Transmission, and Evolution during Seven Months in Sierra Leone. <i>Cell</i> 161, 1516-1526. |  |
| Beast v1.8.2                                        | Drummond, A.J., Suchard, M.A., Xie, D., and Rambaut, A. (2012). Bayesian phylogenetics with BEAUti and the BEAST 1.7. <i>Mol Biol Evol</i> 29, 1969-1973.                                                                                                                    |  |
| Tracer v1.6                                         | <a href="http://tree.bio.ed.ac.uk/software/tracer/">http://tree.bio.ed.ac.uk/software/tracer/</a>                                                                                                                                                                            |  |
| CLC Genomics v9.0                                   |                                                                                                                                                                                                                                                                              |  |
| PopArt v1.7.2                                       | <a href="http://popart.otago.ac.nz/index.shtml">http://popart.otago.ac.nz/index.shtml</a>                                                                                                                                                                                    |  |
| FreeBayes v1.0.2                                    | Garrison, E.a.M., G. (2012). Haplotype-based variant detection from short-read sequencing. <i>arXiv</i> 1207.3907 [q-bio.GN]                                                                                                                                                 |  |
| IRMA v0.6.5                                         | Shepard, S.S., Meno, S., Bahl, J., Wilson, M.M., Barnes, J., and Neuhaus, E. (2016). Viral deep sequencing needs an adaptive approach: IRMA, the iterative refinement meta-assembler. <i>BMC Genomics</i> 17, 708.                                                           |  |
| Tableau v10.0                                       |                                                                                                                                                                                                                                                                              |  |
| paml v4.5                                           | <a href="http://abacus.gene.ucl.ac.uk/software/paml.html">http://abacus.gene.ucl.ac.uk/software/paml.html</a>                                                                                                                                                                |  |
| Custom strandedness, ADAR, and samogitia.py scripts | <a href="https://github.com/jtladner/">https://github.com/jtladner/</a> and <a href="https://github.com/evk3/EBOV_semen_sequencing">https://github.com/evk3/EBOV_semen_sequencing</a>                                                                                        |  |
| Samogitia.py scripts                                | <a href="https://github.com/blab/baltic">https://github.com/blab/baltic</a> , by Gytis Dudas                                                                                                                                                                                 |  |



## **Sierra Leone Ebola Virus Persistence Study Group Affiliations:**

- **Sierra Leone Ministry of Health and Sanitation:** Gibrilla Fadlu Deen (principle investigator), James Bangura, Amara Jambai, Faustine James, Alie H. Wurie, Francis Yamba
- **Sierra Leone Ministry of Defense:** Foday Sahr, Foday R. Sesay, Thomas A. Massaquoi
- **Sierra Leone Ministry of Social Welfare, Gender, Children's Affairs:** Tina Davies
- **World Health Organization (WHO):** Nathalie Broutet (principle investigator), Pierre Formenty, Anna E. Thorsen, Archchun Ariyaratnam, Marylin Carino, Antoine Coursier, Kara N. Durski, Ndema Habib, Philippe Gaillard, Sihem Landoulsi, Margaret O. Lamunu, Jaclyn E. Murrain, Suzanna L.R. McDonald, Dhamari Naidoo
- **United States Centers for Disease Control and Prevention (US-CDC):** Barbara Knust (principle investigator), Neetu Abad, Kyle T. Bernstein, Elizabeth Ervin, John D. Klena, Tasneem Malik, Oliver Morgan, Stuart T. Nichol, Christine Ross, Ute Ströher
- **Chinese Center for Disease Control and Prevention (China-CDC):** Wnbo Xu (principle investigator), Hongtu Liu, William Jun Liu, Yong Xiang, Guizhen Wu, Mifang Liang
- **Joint United Nations Programme on HIV/AIDS (UNAIDS):** Patricia Ongpin
